# Supplementary material for: Dynamics of nevus development implicate cell cooperation in the growth arrest of transformed melanocytes
Source: eLife. 2020 Oct 13;9:e61026. doi: 10.7554/eLife.61026 (PMC7553774; doi:10.7554/eLife.61026)
Supplement: Figure 3—figure supplement 3—source data 1. — The data were first converted from Affymetrix probe set IDs to current gene symbols using DAVID (https://david.ncifcrf.gov/). Fold-change data were log2-transformed. When multiple probesets mapped to the same gene, log2-fold changes were averaged, and the lowest FDR value was retained. Human gene symbols were then converted to mouse ortholog symbols (using https://www.genenames.org/ and http://www.informatics.jax.org) wherever unambiguous assignments could be made. ‘BH FDR’=Benjamini Hochberg false discovery rate. [file elife-61026-fig3-figsupp3-data1.xlsx]

## Sheet: Sheet1
Source Data for Figure 3, Supplement 3
Data are derived from Table S1 of Pawlikowski et al., 2013. The data were first converted from Affymetrix probe set IDs to current gene symbols using DAVID (https://david.ncifcrf.gov/). Fold change data were log2-transformed. When multiple probesets mapped to the same gene, log2-fold changes were averaged, and the lowest FDR value was retained. Human gene symbols were then coverted to mouse ortho…
Gene Symbol	BRAF vs Empty Vector (log2 fold change)	BH FDR
A2m	-0.745826	0.000266693
Aacs	-1.92996	0.00226161
Prxl2c	-2.35519	0.00157467
Aak1	1.02316	0.000865514
Aamdc	-0.95193	0.00300404
Aass	-0.945605	0.0064254
Abat	-1.69097	0.00642325
Abca1	2.01899	0.00245612
Abca5	-2.50375	0.00395087
Abcb1a	-2.42309	0.00262019
Abcb10	-1.82919	0.00125268
Abcb4	-2.19105	0.0133834
Abcb5	-3.18172	0.000696103
Abcb6	-1.33493	0.0482688
Abcb7	-0.594036	0.0271171
Abcb8	-1.01484	0.0402721
Abcb9	1.59227	0.0116566
Abcc2	-1.49957	0.00478385
Abcc3	2.05992	0.00071609
Abcc4	-1.07386	0.005537
Abcd3	0.630666	0.00363562
Abcd4	-0.969512	0.00135462
Abcf3	0.632939	0.0268289
Abcg1	1.94435	0.000179513
Abcg2	-0.976144	0.0269381
Abhd10	0.926578	0.0287217
Abhd12	-1.33432	0.008024
Abhd13	-0.637633	0.0331545
Abhd16a	1.04712	0.00921282
Abhd17c	1.60654	0.00488917
Abhd2	1.21596	0.00315655
Abhd3	-1.72333	0.0283542
Abhd5	1.1986	0.00686049
Abi1	-0.716645	0.0151027
Abi2	1.77138	0.000792417
Abl2	-1.4054	0.00238822
Ablim1	-1.36208	0.014285
Ablim3	2.33909	0.00161965
Abtb2	1.95105	0.00615434
Acaa2	-1.42816	0.0054767
Acaca	-1.76924	0.000923912
Acacb	-2.1104	0.00075844
Acadm	-1.09976	0.0152648
Acadsb	-0.816604	0.0151764
Acadvl	1.99311	0.00118228
Acan	0.937651	0.00776092
Acat1	-1.85929	0.000614992
Acat2	-1.42784	0.000552181
Acbd5	-0.782125	0.0469212
Accs	-1.02612	0.00453985
Acer3	-0.733703	0.0313513
Acot2	-0.790836	0.00925655
Acot7	2.08719	0.00601266
Acot8	0.893662	0.0499742
Acox2	0.715498	0.0303682
Acox3	-1.17792	0.00633982
Acp2	1.61416	0.00873883
Acp5	-3.18245	0.00143847
Acp6	0.96705	0.00879157
Acpp	1.92891	0.00828878
Acr	-1.08224	0.00434558
Acsf2	-3.2463	0.00453985
Acsl1	-0.663135	0.0321623
Acss1	-1.81282	0.00285809
Acss2	1.65706	0.015932
Acss3	1.15821	0.0153617
Actg2	2.69325	0.0180761
Actn1	1.27404	0.0110708
Actn2	0.633494	0.0242374
Actn4	2.13241	0.00126523
Actr3	-1.22982	0.00350553
Actr8	-0.60164	0.0238904
Acvr1	1.20151	0.045898
Acvr1c	-1.32693	0.0292547
Acvr2b	-0.902916	0.00387991
Acvrl1	-1.33661	0.0417849
Acyp1	-1.02029	0.0143908
Ada	-1.0339	0.0167346
Adal	-1.22451	0.0453964
Adam10	-0.920445	0.00409247
Adam12	-1.34421	0.0168445
Adam19	6.96724	0.00075855
Adam22	-0.82836	0.00276982
Adam23	-4.34917	0.000764347
Adam28	1.46847	0.0484527
Adamts1	3.23921	0.000925445
Adamts12	2.71705	0.00998744
Adamts2	-2.24901	0.00396684
Adamts5	4.2388	0.000162069
Adamts6	1.14785	0.0465106
Adamts8	0.681743	0.0137969
Adamts9	3.19003	0.000646217
Adamtsl4	3.6873	0.00999364
Adat2	-1.47919	0.000926331
Adck1	-1.60572	0.00147299
Adcy1	-1.76833	0.0383907
Adcy3	-1.92699	0.00130408
Adcy9	-2.2784	0.000240906
Add2	-1.29574	0.00507826
Adgra2	-2.4464	0.00371094
Adgra3	-1.1195	0.00900613
Adgre5	4.78807	0.000926699
Adgrf4	5.03822	0.00281275
Adgrg1	0.729585	0.0175728
Adgrg2	3.96221	0.000816292
Adgrl2	1.09657	0.00991957
Adgrl3	0.706747	0.0115964
Adgrl4	5.37836	0.000815351
Adi1	-1.01136	0.00540923
Adk	1.3024	0.0174215
Adm	1.08018	0.00838803
Ado	-0.665569	0.0237242
Adora3	2.62771	0.0132407
Adprh	-1.10066	0.0284234
Adprm	-1.17927	0.0397018
Adra2a	6.95399	0.000254759
Adrb2	-1.14903	0.0254791
Adssl1	-2.41706	0.00115107
Aebp1	-0.785484	0.0440159
Afap1l1	-3.46004	0.00182377
Afap1l2	1.69501	0.0312743
Afdn	1.01723	0.0139905
Aff2	3.23656	0.00149462
Aff3	-1.08737	0.0237361
Aff4	1.0445	0.0064927
Afg3l1	-0.877245	0.00867374
Afg3l2	-1.00523	0.00547614
Aftph	0.597202	0.0126541
Aga	1.68594	0.00309618
Agbl5	1.54896	0.00667587
Agl	-1.21582	0.00473121
Agmat	-1.23427	0.0100644
Ago2	0.638454	0.0397564
Ago3	1.03707	0.009664
Ago4	-1.61899	0.00759196
Agpat1	1.29156	0.0045814
Agpat3	-0.599283	0.00331044
Agpat5	-0.804825	0.036597
Agtrap	0.636744	0.0380299
Ahcy	-0.793481	0.00708166
Ahcyl2	0.757913	0.0337201
Ahi1	0.939712	0.0110402
Ahnak	-0.826485	0.0169642
Ahr	1.92828	0.0091782
Ahrr	-1.26703	0.00316885
Aida	0.626478	0.00918675
Aif1l	-2.24355	0.00243005
Aifm1	-0.598523	0.0172555
Aig1	-0.74443	0.00909061
Aurkb	-1.74582	0.0117063
Aim2	0.636514	0.0375724
Ajuba	-0.967001	0.00890726
Ak2	-1.02214	0.00111875
Ak3	-0.980745	0.00296728
Ak4	1.68537	0.000559234
Ak5	-1.88706	0.00483291
Ak6	-0.646211	0.0125908
Ak7	-0.855612	0.010413
Akap1	-0.591043	0.00406187
Akap12	0.70071	0.00848006
Akap13	1.22365	0.0057496
Pakap	2.79192	0.00180917
Akap3	4.5024	0.000255301
Akap7	-2.05052	0.00648472
Akirin1	0.972773	0.0182207
Akirin2	1.75787	0.00368128
Akr1b8	0.734239	0.0056697
Akr1c21	2.04116	0.0085018
Akr1e1	-0.8086	0.0225312
Akt3	-0.859408	0.00150756
Alad	-1.20972	0.00394316
Alcam	-1.08081	0.029027
Aldh18a1	-1.34674	0.011111
Aldh1a1	4.65616	0.000434259
Aldh1a3	3.86648	0.000327585
Aldh1b1	-0.926367	0.0246129
Aldh1l2	-2.69525	0.000891972
Aldh2	-2.36806	0.000682153
Aldh3a2	1.47758	0.000804163
Aldh4a1	-0.76863	0.00297909
Aldh7a1	-0.885865	0.00156021
Aldh9a1	-0.70863	0.0294238
Aldoa	0.910618	0.00598006
Alg1	-0.912522	0.00521551
Alg10b	-1.09432	0.0215395
Alg14	-1.66092	0.00369654
Alg9	-1.76703	0.00765749
Alox8	2.30325	0.00468066
Aloxe3	2.3006	0.0117848
Alpk1	-1.20228	0.0170292
Als2	-0.689294	0.0394583
Alx1	-0.79132	0.00400787
Ammecr1	0.793926	0.0125059
Amotl1	2.0522	0.00123904
Amotl2	-2.81281	0.00437471
Ampd3	2.15815	0.00116696
Amy1	2.80605	0.000614992
Amz2	0.732752	0.0162019
Anapc1	-0.778465	0.00718476
Anapc15	-0.993604	0.00725676
Anapc16	0.974691	0.00593076
Anapc7	-1.17464	0.0153806
Angptl1	1.2761	0.0168599
Angptl2	-2.39475	0.00422443
Angptl4	5.78576	0.000305752
Ank3	3.7517	0.000115332
Ankdd1a	-1.58062	0.0117315
Ankfy1	-0.753931	0.00104944
Ank	1.9465	0.000972243
Ankhd1	-0.901701	0.015252
Ankle1	-2.53459	0.00525106
Ankrd10	-0.658517	0.0134603
Ankrd13c	-0.663535	0.0392147
Ankrd23	-1.00408	0.0162283
Ankrd28	-1.03828	0.00715643
Ankrd37	1.05374	0.00266575
Ankrd39	-0.832281	0.0215514
Ankrd40	-0.719826	0.0167316
Ankrd44	-1.20214	0.00922097
Ankrd50	-0.943043	0.0105091
Ankrd6	3.87593	0.000207733
Ankrd7	-0.713241	0.0330806
Ankrd9	-2.30544	0.000390687
Anks6	-1.37773	0.0152758
Anln	-4.85591	0.000660058
Ano4	3.31307	0.00135897
Anp32a	-0.808148	0.00992221
Anpep	6.64494	0.000249482
Antxr1	-1.64498	0.00123794
Antxr2	3.29621	0.000804163
Anxa1	2.02042	0.000252393
Anxa2	0.817185	0.000815351
Anxa3	0.981467	0.0214696
Anxa4	-0.712854	0.00172273
Anxa5	-1.00351	0.00626694
Anxa6	-0.967431	0.0231183
Anxa9	1.60932	0.0263017
Aoc1	0.680935	0.036597
Aox1	1.90897	0.0153082
Ap1ar	-0.602048	0.0223191
Ap1s1	1.09807	0.00519831
Ap1s2	1.8535	0.00131059
Ap1s3	0.959535	0.0227326
Ap2m1	0.878874	0.0290217
Ap2s1	1.23992	0.0068143
Ap3m2	-1.3863	0.00248597
Ap5m1	-0.773315	0.0382964
Apba1	-1.12751	0.0168888
Apba2	-1.44246	0.00448205
Apbb1ip	3.50913	0.000766575
Apc	-0.79947	0.0125488
Aph1a	-0.718915	0.0162256
Aph1b	-2.52652	0.00098165
Cenps	-0.658161	0.0142464
Aplp2	1.34594	0.00143847
Apmap	0.613952	0.028865
Apobec3	0.815868	0.0486015
Apoc1	-2.01191	0.000764921
Apod	5.8627	0.000710448
Apoe	-1.44842	0.0156751
Apold1	-1.4471	0.00380318
Apoo	2.51807	0.00191441
Appl2	1.0032	0.00103317
Aqp11	-1.05454	0.0196103
Aqp3	2.72297	0.0118552
Ar	0.90837	0.0149961
Arcn1	0.667108	0.0305393
Areg	7.8422	0.000115332
Arf1	1.11048	0.0232746
Arf3	0.8331	0.00406954
Arfip1	1.04121	0.0103411
Arg2	0.79366	0.0154714
Arhgap11a	-2.93007	0.00316229
Arhgap18	0.609208	0.0350872
Arhgap19	-0.690462	0.0116698
Arhgap22	4.77719	0.00232303
Arhgap24	-1.19699	0.0106957
Arhgap25	-0.938036	0.0103563
Arhgap27	2.05921	0.00563
Arhgap31	0.722798	0.0152597
Arhgap32	0.726139	0.010255
Arhgap33	-2.90628	0.00366829
Arhgap42	-2.95587	0.002674
Arhgap45	-0.798239	0.0107913
Arhgap5	1.28072	0.0040426
Arhgef10	-1.61772	0.00411719
Arhgef10l	-0.890858	0.00551732
Arhgef12	-0.646544	0.0485591
Arhgef18	-0.62785	0.00595234
Arhgef2	1.08556	0.0052066
Arhgef25	-0.837479	0.00680851
Arhgef28	-1.09346	0.0346621
Arhgef3	-0.971464	0.0120386
Arhgef37	0.975607	0.000510285
Arhgef40	1.75429	0.000677413
Arhgef5	-1.16282	0.030961
Arhgef6	-1.83349	0.00012359
Arid1b	-0.886838	0.0110549
Arid4a	-1.40689	0.0154296
Arid5b	-0.28338	0.00365204
Arih2	-0.69331	0.0467372
Arf2	-1.21639	0.0149961
Arl2	-0.781905	0.0145428
Arl4a	1.13912	0.00382794
Arl4c	-1.05358	0.000679905
Arl4d	4.34252	0.00113253
Arl5b	0.737784	0.00925655
Arl6ip5	0.633393	0.0122247
Armc9	-1.73959	0.00386187
Armcx1	-1.42018	0.00192351
Armcx4	-1.42742	0.00439774
Bhlhb9	-0.708253	0.0287275
Arnt2	1.13215	0.0344878
Arntl	1.94029	0.002071
Arntl2	2.11059	0.00400089
Arpc5	0.626234	0.00184368
Arpc5l	0.891263	0.00409247
Arpin	-1.62333	0.00134025
Arrb1	-1.65578	0.00224982
Arrb2	-1.45695	0.0150707
Arrdc3	0.588179	0.0331413
Arrdc4	1.16838	0.00552869
Arsb	1.40784	0.00325205
Arsg	1.67446	0.00071609
Arsj	1.12828	0.00884786
Arsk	1.24082	0.0155671
Art3	2.37229	0.0048537
As3mt	-3.13232	0.0065584
Asah1	-1.69992	0.00123967
Asap3	-1.10189	0.0370595
Asb13	-1.38889	0.0107582
Asb6	0.820135	0.0432322
Asb9	-2.47984	0.0074
Asf1a	1.35857	0.00254907
Asf1b	-2.31876	0.0062247
Asl	1.34597	0.0149812
Asns	4.28221	0.000435858
Aspa	-1.36403	0.0010264
Asph	-0.794031	0.0195795
Asphd1	1.46781	0.0213022
Aspm	-4.5939	0.00105618
Asrgl1	-0.724032	0.0235887
Astn1	1.85197	0.00177567
Astn2	-1.37511	0.00971584
Asxl1	-0.98322	0.00629055
Atad2	-2.57882	0.000774845
Atad5	-2.05761	0.00474339
Ate1	-0.749968	0.0384706
Atf4	0.591117	0.00116998
Atf7	0.968053	0.0108723
Atf7ip	0.685757	0.0169402
Atf7ip2	-1.55238	0.00130113
Atg101	1.28057	0.0185159
Atg14	-1.1218	0.0196462
Atg16l1	1.33768	0.0033115
Atg2b	-1.0696	0.00477403
Atg4c	-1.06697	0.00792648
Atg5	0.707261	0.0327296
Atg7	1.11868	0.0145676
Atl2	1.0874	0.0156027
Atm	-0.970209	0.000420731
Atmin	0.692103	0.0407765
Atox1	1.53104	0.00102343
Atp10a	-1.80713	0.00137228
Atp10b	3.96655	0.000923912
Atp10d	1.23875	0.00371094
Atp11a	-1.72952	0.0216481
Atp13a1	0.684515	0.0214771
Atp13a3	0.948998	0.00472976
Atp1b1	2.03035	0.000711782
Atp1b3	0.708894	0.0306384
Atp23	-1.06741	0.0112791
Atp2a2	-1.36123	0.000795374
Atp2b1	3.03965	0.00051722
Atp2b4	1.53938	0.00262581
Atp2c1	-0.712019	0.0133412
Atp5g3	-0.857925	0.00551994
Atp5l	-0.800813	0.025398
Atp6v0a4	-2.10455	0.00593077
Atp6v0b	0.746501	0.0177488
Atp6v0d2	3.15689	0.00026473
Atp6v1b2	-0.872405	0.00595234
Atp6v1c1	-1.18183	0.00305859
Atp6v1e1	0.642987	0.0213165
Atp7a	-1.1197	0.0108527
Atp7b	-1.42798	0.0138945
Atp8b2	-0.782203	0.00364142
Atp8b3	-2.06339	0.00431216
Atpaf2	0.884404	0.00189294
Atr	-0.608919	0.0278407
Atrnl1	-3.46104	0.0100256
Atrx	-0.589824	0.0262786
Auh	-0.996143	0.0344021
Aunip	-1.50534	0.00162794
Aurka	-1.03364	0.000420731
Auts2	-2.50516	0.00753267
Avl9	0.73644	0.0327576
Avpi1	-0.78153	0.00185069
Axin2	-1.2199	0.00547614
Axl	4.23576	0.000308886
Azgp1	1.66698	0.0118291
B3galnt1	-2.84196	0.00107017
B3glct	-2.09388	0.000656546
B3gnt2	0.645412	0.0149219
B3gnt3	1.64736	0.00912039
B3gnt5	3.15772	0.000369854
B3gnt9	1.0966	0.0299975
B4galnt3	3.36944	0.000534947
B4galt1	1.77211	0.00134632
B4galt5	-0.708699	0.0104609
B4galt6	1.05282	0.0029701
B4galt7	0.94711	0.0155233
Bace1	0.65014	0.00490628
Bach1	1.49712	0.0105291
Bach2	-0.618384	0.0190524
Bag1	-1.29928	0.0222822
Bag3	1.3435	0.0018383
Bahcc1	-1.2079	0.0466631
Baiap2l1	-1.88396	0.00247098
Bambi	-1.10044	0.00546165
Banp	-0.958609	0.0151483
Bard1	-2.41442	0.00066518
Basp1	1.04788	0.0293706
Bax	-0.600947	0.0134357
Baz1a	-0.647624	0.00732956
Bbip1	-1.03839	0.000773849
Bbs1	-0.646599	0.0392363
Bbs2	0.887086	0.000891646
Bbs4	-0.836793	0.0120204
Bbs5	-1.65974	0.00308195
Bbs7	-0.93583	0.0150044
Bbx	0.794843	0.00084178
Bcan	-2.62851	0.00268165
Bcap29	0.972642	0.00997538
Bcap31	0.956501	0.0175016
Bcat1	5.14267	0.000162069
Bccip	1.47284	0.0169756
Bcdin3d	-0.820669	0.0150472
Bche	-5.35811	0.00128265
Bcl2	-3.29376	0.00222656
Bcl6	1.10537	0.00832436
Bcl7a	-1.19246	0.0108194
Bcl9	0.953878	0.00598411
Bcl9l	1.76653	0.0135677
Bcr	1.79687	0.000815351
Bdh1	-1.79936	0.00251587
Bdh2	-1.22537	0.00690744
Bdkrb2	2.37126	0.00568664
Bdp1	-0.60683	0.0263503
Bend6	1.25566	0.0289513
Bend7	-1.69664	0.0157794
Best1	-2.28439	0.002674
Bex2	5.40085	0.000187975
Bex4	-0.852382	0.00496231
Bhlhe40	1.14453	0.0240978
Bicd1	1.15387	0.00216107
Bin1	2.05229	0.000419505
Birc3	3.92038	0.000115332
Birc5	-3.66096	0.000705575
Bivm	0.623482	0.00645702
Blm	-2.91745	0.000881238
Blmh	-0.898258	0.0392414
Bloc1s1	1.21711	0.0255631
Blvra	-1.82167	0.000596984
Bmp2	8.81366	9.43102e-05
Bmp2k	-0.695411	0.0178733
Bmp4	-0.999469	0.0341084
Bmp6	4.3276	9.43102e-05
Bmp8b	2.72142	0.00164799
Bmpr1a	-0.843982	0.0474795
Bmpr2	-0.90383	0.000868932
Bmt2	0.845064	0.0206444
Bnc1	4.81354	0.000196009
Bnc2	-2.41968	0.000239697
Bnip2	-0.697032	0.00757091
Bnip3	1.54672	0.00572439
Boc	-1.15142	0.027749
Bod1	-0.606749	0.005537
Bora	-1.84789	0.00689971
Borcs7	-0.601427	0.0175523
Borcs8	0.835042	0.000778989
Bphl	-1.82	0.00774269
Bpnt1	-1.00858	0.0303221
Bptf	-0.792443	0.000524004
Brca1	-2.48008	0.00332981
Brca2	-2.4867	0.00422545
Brd1	-0.63861	0.00675265
Brd8	-0.764664	0.00339495
Babam2	-0.631698	0.00234479
Bri3bp	-0.956446	0.0238523
Brip1	-3.33785	0.00319499
Brms1	0.641189	0.0283868
Brms1l	-0.891188	0.0108473
Brox	-0.866002	0.0267621
Brpf3	0.847377	0.0331836
Bsdc1	0.646852	0.00118839
Bsg	1.28493	0.0119315
Bst1	-2.31152	0.00265792
Btbd11	5.55625	0.000108729
Btc	4.18966	0.000730485
Btd	-1.35833	0.00128265
Btg1	1.29762	0.0059842
Btn2a2	1.07374	0.0108527
Btnl4	6.35185	0.000658061
Btnl9	0.655588	0.0287275
Bub1	-3.68869	0.000318895
Bub1b	-5.07989	0.000432285
Bud13	-0.590735	0.0393599
Bud31	0.625719	0.0327977
Bzw1	1.08027	0.000899202
Depp1	2.31839	0.016769
Lrmda	-2.40862	0.000315091
Tasor2	-0.765917	0.0341783
D7Ertd443e	-3.03601	0.0014875
1110004F10Rik	-0.688973	0.00590573
AI837181	0.957217	0.00276365
Gm5617	-1.44925	0.0162204
Iftap	-0.956694	0.00791582
Gm13889	-1.21673	0.00443924
D6Wsu163e	-0.886164	0.00228705
2410131K14Rik	-0.835182	0.016685
1500009L16Rik	-2.58546	0.00178124
2610524H06Rik	-2.67239	0.00216694
D430019H16Rik	-0.809512	0.0140087
Dglucy	3.55511	0.00426088
Atp5mpl	-0.725793	0.00332849
Armh4	-1.00252	0.0106478
BC052040	-0.914143	0.0114364
AA467197	8.94339	9.43102e-05
Ccdc32	-1.19606	0.017371
Insyn1	-2.21199	0.00424043
2300009A05Rik	-1.48266	0.00956594
Bmerb1	1.64339	0.0080506
D230025D16Rik	1.0267	0.0306687
1810013L24Rik	0.913301	0.00317729
1700018B08Rik	-2.08302	0.000188301
1810010H24Rik	-1.45811	0.00250002
Epop	3.59867	0.000355125
2700062C07Rik	1.48273	0.00995918
4930503L19Rik	-2.28623	0.00088488
1600014C10Rik	-1.69747	0.00211594
Uri1	-0.700579	0.0110549
D8Ertd738e	0.692447	0.0063089
Zswim9	-0.89558	0.00938822
C1galt1	0.928734	0.0256711
BC055324	-2.12002	0.0078672
C130074G19Rik	-1.32479	0.0203614
1700025G04Rik	-1.40406	0.00715643
5730409E04Rik	0.729214	0.000552181
AU022252	0.624994	0.0299323
BC028528	-0.678696	0.0148138
Gm128	0.828582	0.012844
C1qbp	-0.585305	0.0247134
C1qtnf3	0.814461	0.00604339
C1qtnf5	-3.37297	9.43102e-05
4930402H24Rik	0.666445	0.0103841
Shld1	-2.35641	0.0025398
Cfap410	-2.06916	0.00596465
Cfap298	0.730987	0.00147299
D16Ertd472e	-1.66717	0.00161835
2510002D24Rik	-1.08093	0.00866623
C2cd2	1.31946	0.0154576
C2cd5	-1.20008	0.00215081
AI597479	0.624147	0.0347487
1700093K21Rik	-0.632166	0.0151854
1700019D03Rik	-1.88326	0.000925445
C3	9.59218	9.43102e-05
C3ar1	3.07745	0.00658843
3830406C13Rik	-1.309	0.000908769
6430571L13Rik	-1.25871	0.0119411
Dipk2a	1.46453	0.00428041
Cfap20dc	2.75592	0.00380455
2510009E07Rik	-1.51685	0.0054693
1810037I17Rik	-1.64317	0.00111333
Fam241a	1.86044	0.00651681
D3Ertd751e	-2.24383	0.00228519
4930579G24Rik	-2.1314	0.0024125
1700029J07Rik	1.23445	0.00781492
9530068E07Rik	1.15056	0.00206502
6030458C11Rik	-1.20556	0.00432028
Macir	-1.54913	0.00169892
Cplane1	-1.254	0.00431196
C330018D20Rik	-1.57235	0.0123135
1600012H06Rik	-0.702576	0.0179767
9130008F23Rik	3.08649	0.00593077
BC004004	0.915841	0.0227005
4921507P07Rik	-2.35282	0.00530737
1810058I24Rik	0.78071	0.00299019
Tcim	6.38528	0.000308886
Sgk3	-2.88894	0.00447668
Vxn	-0.774063	0.0103156
AI429214	0.724073	0.0276728
Gm11837	-1.29999	0.0411273
1110008P14Rik	1.34	0.0192241
Aopep	1.0427	0.0243861
D030056L22Rik	-1.82479	0.00157764
4933430I17Rik	-1.44823	0.00685446
C9orf72	1.84896	0.0120537
1110059E24Rik	-0.735284	0.0248807
Car12	-0.747826	0.00721171
Car14	-4.63479	0.000649165
Car5b	-1.11763	0.00411624
Car8	-2.41854	0.000803185
Caap1	0.957632	0.0213022
Cables1	-3.18621	0.00102017
Cables2	-1.27941	0.0109647
Cabyr	-1.37271	0.0035016
Cacna1a	-2.66894	0.000622165
Cacna2d1	1.15063	0.00226247
Cadm1	0.97976	0.0159799
Cadm4	1.48474	0.00783401
Cadps	0.827602	0.021068
Cadps2	-0.9786	0.00262979
Calb2	1.34524	0.0076062
Cald1	-0.764143	0.0207236
Calml4	-2.5622	0.00078086
Camk2d	0.904873	0.00142736
Camk2g	-1.1705	0.0125269
Camk2n1	2.06735	0.000420731
Camk4	-0.655886	0.0119497
Camkk2	-0.803903	0.0414117
Camkmt	-0.596466	0.0368896
Camta1	-1.39514	0.0288118
Camta2	0.894302	0.0154889
Cand2	-2.40478	0.0211555
Cant1	0.74627	0.0039318
Canx	-1.012	0.00290498
Cap2	-3.04369	0.00225127
Capn2	0.682578	0.0157697
Capn3	-2.02757	0.000991144
Capn5	2.61321	0.000714287
Capn6	2.74179	0.000791179
Caprin2	2.21319	0.00143263
Card19	1.70669	0.00634886
Card6	0.890322	0.0187868
Carhsp1	1.0365	0.00455594
Carmil1	-0.735476	0.00848835
Carnmt1	-0.753753	0.0309205
Cars	0.977161	0.0166026
Casd1	-2.57521	0.00227718
Cask	0.910926	0.00108606
Casp1	-3.18658	0.00107081
Casp2	-0.638103	0.0300221
Casp4	-0.952316	0.00803026
Casp7	-1.04914	0.00547614
Casp9	1.24923	0.0139499
Casq2	-2.76701	0.0146462
Cav1	-1.7641	0.001818
Cbl	0.854241	0.000919353
Cblb	-0.966958	0.037002
Cbln1	1.1729	0.0342614
Cbln3	2.18274	0.00979697
Cbln4	1.58598	0.00108472
Cbr3	-1.80345	0.00404046
Cbx2	-2.15562	0.0147415
Cbx3	-0.747293	0.00193101
Cbx5	0.588354	0.0283149
Cc2d2a	-1.85896	0.0109453
Ccdc110	-0.653849	0.0400994
Ccdc112	-1.13801	0.026837
Ccdc113	1.68334	0.00504513
Ccdc125	1.02548	0.00152911
Ccdc134	-0.651251	0.0123745
Ccdc136	-1.89506	0.00551918
Ccdc138	-1.00994	0.0472904
Ccdc14	-0.924435	0.0353128
Ccdc149	-1.06256	0.0180326
Ccdc15	-1.46037	0.0220949
Ccdc150	-1.67172	0.00108804
Ccdc157	1.09072	0.0270183
Sohlh2	-0.718274	0.0146765
Ccdc171	-3.26201	0.00075855
Ccdc18	-1.7564	0.00190653
Ccdc184	1.59809	0.0319856
Ccdc34	-1.73128	0.00177264
Iho1	-0.670603	0.00165334
Ccdc43	-0.945332	0.00410378
Ccdc50	-0.859892	0.00775482
Ccdc71l	2.05975	0.00316938
Ccdc80	-1.71211	0.00390756
Ccdc87	0.770525	0.032469
Cchcr1	-0.807412	0.0113166
Ccl20	8.06377	0.000157343
Ccl28	-2.35336	0.00139403
Ccl3	1.41243	0.0332159
Ccna1	8.57398	0.000177234
Ccna2	-3.0475	0.00105618
Ccnb1	-3.18462	0.000881238
Ccnb1ip1	-2.52597	0.00161852
Ccnb2	-4.37483	0.00156848
Ccnd1	-0.641607	0.00999994
Ccnd2	4.52137	0.00027063
Ccne1	-1.29999	0.0129102
Ccne2	-2.79349	0.000186308
Ccnf	-1.21465	0.00275579
Ccng1	-0.878123	0.000582125
Ccng2	-1.30557	0.0039411
Ccnjl	0.97665	0.0238443
Ccnl1	-0.723642	0.0175795
Ccr1	3.10332	0.00036563
Ccsap	-1.59907	0.00325734
Ccser2	-0.648307	0.0249789
Cct6b	-1.06735	0.0387413
Cd151	0.768378	0.0363208
Cd1d1	4.40856	0.000746371
Cd226	1.36985	0.0131748
Cd24a	1.42435	0.00277802
Cd28	0.813049	0.0242825
Cd36	-4.3615	0.000372177
Cd37	-1.45995	0.0357354
Cd44	-0.633431	0.0153712
Cd47	-1.31922	0.0011522
Cd53	5.56048	0.000988135
Cd55	2.79661	0.000248656
Cd59b	0.737461	0.000997888
Cd74	5.16149	0.000157343
Cd79b	-0.889504	0.00371929
Cd82	1.94075	0.00321323
Cd83	-3.21005	0.00102485
Cd93	1.16567	0.0188348
Cd96	1.28776	0.000681543
Cd99	-0.77353	0.030383
Cdc14b	-1.41822	0.00105707
Cdc20	-1.94392	0.00115676
Cdc23	-0.735454	0.0161052
Cdc25a	-1.73999	0.00108825
Cdc25b	-0.903688	0.00831372
Cdc25c	-1.34346	0.0056433
Cdc37	0.949848	0.0116584
Cdc42	0.632672	0.0297349
Cdc42bpa	-0.823389	0.0231485
Cdc42bpb	0.762508	0.0325801
Cdc42bpg	-1.87578	0.042008
Cdc42ep1	-0.94031	0.0242607
Cdc42ep3	1.245	0.00146067
Cdc42se1	1.07385	0.00449241
Cdc45	-1.49129	0.00178124
Cdc6	-2.28594	0.000474813
Cdc7	-3.04619	0.00306125
Cdca2	-4.18508	0.000448364
Cdca3	-3.10843	0.00143847
Cdca4	-0.704308	0.0430325
Cdca5	-3.73145	0.00137329
Cdca7	-3.14533	0.000629078
Cdca7l	-3.61043	0.00369875
Cdca8	-3.1384	0.00194852
Cdcp1	7.5156	0.000115332
Cdh1	-4.11207	0.000232725
Cdh11	1.43813	0.00691328
Cdh19	2.88188	0.00036283
Cdh2	1.43236	0.00685446
Cdh3	-1.70315	0.00167465
Cdh6	3.64582	0.000385231
Cdh7	2.98642	0.00149036
Cdk1	-4.17206	0.00036826
Cdk14	2.73955	0.00213915
Cdk15	-1.75516	0.0129294
Cdk16	1.3594	0.00562363
Cdk17	1.08226	0.00509835
Cdk2	-2.19864	0.00198023
Cdk20	-1.23777	0.0199523
Cdk4	-0.995086	0.00139403
Cdk5r1	-2.3267	0.000568241
Cdk5rap2	2.04655	0.00193101
Cdk7	0.621488	0.0499353
Cdkl2	-2.47094	0.00451336
Cdkl3	0.979998	0.0241802
Cdkn1a	1.08671	0.00221633
Cdkn1b	-1.24446	0.00484365
Cdkn2a	2.32294	0.00517039
Cdkn2b	7.43288	0.00027421
Cdkn2c	-2.33073	0.00129018
Cdkn3	-4.12769	0.000581258
Cdon	-1.09258	0.0163189
Cdr1	-1.1497	0.000157343
Cds2	-1.17948	0.0017377
Cdt1	-3.4556	0.00759401
Cdyl	-0.684144	0.00822823
Cdyl2	3.49745	0.0026763
Ceacam1	-1.98733	0.00191918
Cebpb	2.64254	0.000266693
Cebpg	1.45509	0.00182765
Cebpzos	0.655597	0.0145599
Cecr2	-1.79515	0.00997887
Celf2	-2.38883	0.000620972
Celf5	1.776	0.00974134
Celf6	-0.73872	0.0314596
Celsr2	-0.838229	0.00714661
Cemip	3.12797	0.00102658
Cenpa	-3.34625	0.000211331
Cenpc1	-1.4133	0.00732956
Cenpe	-4.03684	0.00055185
Cenpf	-4.02049	0.00120476
Cenph	-2.34365	0.000900424
Cenpi	-2.41315	0.00114596
Cenpj	-2.09609	0.00104944
Cenpk	-2.66218	0.00583403
Cenpm	-1.68804	0.0124049
Cenpn	-1.68641	0.000815351
Cenpo	-1.51361	0.000186308
Cenpq	-2.17781	0.010742
Cenpu	-2.95614	0.0016732
Cenpw	-3.25929	0.00104944
Cep112	-1.63917	0.0190043
Cep126	-1.45612	0.040045
Cep128	-1.45352	0.00483291
Cep135	-1.311	0.00572302
Cep152	-0.948262	0.0210078
Cep162	-1.12975	0.0383312
Cep192	-0.616553	0.0490192
Cep295	-1.17181	0.0232097
Cep55	-5.29457	0.0013898
Cep70	-0.79429	0.013783
Cep72	-1.85051	0.00365201
Cep78	-1.47482	0.00609664
Cep85l	1.38402	0.032389
Cep89	-1.3858	0.00141551
Cep95	-0.760119	0.0309279
Cerk	-0.678797	0.0249752
Cers2	1.15104	0.00490917
Cers6	-0.996781	0.00296393
Ces1d	-1.43629	0.0210631
Cfap36	0.798094	0.0235147
Cfap54	0.804451	0.0445683
Cfap61	-2.87759	0.00107109
Cfap97	-1.00515	0.0317403
Cfh	-2.80114	0.00235412
Cfl2	-0.850332	0.0133834
Chac1	1.49538	0.00886972
Chaf1a	-1.5572	0.00101172
Chaf1b	-1.78588	0.000745132
Chchd10	-1.39369	0.0139647
Chchd3	-1.01791	0.00476485
Chchd6	-1.3025	0.00437729
Chchd7	0.790031	0.000391471
Chd1	-0.740904	0.0178733
Chd2	0.857682	0.0135969
Chd3	-1.67034	0.00071609
Chd6	-1.14333	0.00411719
Chd7	-1.04277	0.0110531
Chd9	1.12694	0.0141026
Chek1	-1.96796	0.00141578
Chek2	-0.934711	0.00713361
Chgb	8.55399	0.000255475
Chic1	-0.921948	0.0290758
Chic2	1.7242	0.00094253
Chka	-0.79127	0.00178952
Chm	0.810294	0.0185081
Chml	-0.932252	0.00532162
Chmp1b	-0.714371	0.0269514
Chodl	1.74154	0.0100586
Chordc1	-0.887872	0.0332784
Chp1	-0.695273	0.00120157
Chpf2	1.62843	0.00406954
Chpt1	-1.10825	0.0331646
Chrdl1	3.49932	0.0107355
Chrm3	3.28688	0.00114817
Chrna5	-1.50549	0.0402989
Chrna9	5.53105	0.00055185
Chst1	5.54174	0.000282129
Chst10	-1.56504	0.0147234
Chst11	1.18489	0.0224987
Chst15	5.22349	0.000276933
Chst2	1.79715	0.00222656
Chst5	5.70464	0.000629078
Chst7	1.31966	0.0256711
Chsy3	-1.13559	0.0042998
Ciao1	0.747388	0.0151128
Ciart	-0.615336	0.00848006
Cib2	-1.44655	0.00436298
Ciita	3.19871	0.000328911
Cir1	-0.60164	0.00808659
Cited1	-0.641807	0.0192616
Cited2	1.80308	0.00691713
Ckap2	-3.33893	0.00808244
Ckap2l	-2.43016	0.0125059
Ckap4	0.823205	0.00496694
Ckap5	-0.817817	0.0211486
Cklf	0.735213	0.00596597
Cks1b	-1.50576	0.00181495
Cks2	-2.15182	0.000135861
Clasp1	0.673887	0.0254791
Clasp2	-1.13449	0.00859046
Clca2	0.815763	0.00464316
Clcc1	-1.58731	0.00143263
Clcf1	3.95504	0.00221779
Clcn3	-0.800647	0.0100263
Clcn6	-1.19697	0.00330368
Clcn7	-0.85265	0.0364426
Cldn22	-0.746621	0.00473244
Cldn23	-0.793535	0.0272496
Clec1b	-2.10179	0.00252451
Clec2d	1.30887	0.00191138
Clec4a2	1.14443	0.0137678
Clec5a	2.82105	0.000751864
Clgn	2.33369	0.0140185
Clic1	0.797779	0.00495884
Clic4	1.05433	0.00135181
Clip1	-0.888407	0.00543372
Clip3	1.33221	0.0272496
Clip4	-0.739233	0.0191531
Clk4	1.00058	0.00559675
Clmn	5.81176	0.00036563
Clmp	8.01953	9.43102e-05
Cln3	-0.730328	0.0182971
Cln6	-1.49235	0.000792417
Clns1a	-0.941514	0.00243807
Clspn	-1.84027	0.0130664
Clstn2	1.62703	0.00387876
Cltb	-0.706904	0.0158191
Cltc	-0.906237	0.045898
Clu	1.11535	0.0108908
Clybl	-0.807839	0.0400787
Cmas	0.931108	0.00493732
Cmbl	-1.45594	0.00036563
Cmklr1	4.36663	0.000276418
Cmss1	-0.611261	0.00254313
Cmtm3	1.15247	0.002674
Cmtm4	1.39309	0.00296711
Cmtm7	0.586153	0.0222254
Cnih3	3.37684	0.000201955
Cnksr3	2.07395	0.00318962
Cnn3	-0.874265	0.0157849
Cnnm1	-1.03916	0.0304572
Cnnm2	-0.726071	0.0402736
Cnot2	-0.620731	0.0107425
Cnot6	-0.877333	0.000804163
Cnppd1	-1.15818	0.0027205
Cnpy3	-0.976324	0.0473737
Cnrip1	-2.67086	0.0019356
Cntln	-1.00713	0.029476
Cntn1	-3.46836	0.000788275
Cntn3	5.55311	0.000631966
Cntnap1	-1.73778	0.0139828
Cntrl	-1.70408	0.0155653
Coa7	-0.927294	0.0107425
Cobl	-0.59875	0.0228244
Cobll1	-1.5451	0.00185256
Cog2	-0.810178	0.00108472
Col11a1	-1.91895	0.000283225
Col18a1	0.6112	0.0291215
Col19a1	0.825785	0.0484257
Col1a2	-3.03624	0.00601037
Col22a1	5.44153	9.43102e-05
Col24a1	-1.46353	0.00656578
Col27a1	-1.3529	0.0133449
Col4a1	-0.694724	0.00594913
Cert1	-1.87666	0.000162069
Col4a5	1.28521	0.00556925
Col4a6	2.96151	0.0259654
Col5a2	-1.39183	0.00672239
Col5a3	2.93515	0.0131294
Col6a3	3.33328	0.00507334
Col7a1	1.67983	0.00497017
Col8a1	7.31636	0.000169408
Col9a3	5.516	0.00107784
Colgalt2	1.95966	0.0325354
Commd10	-0.69509	0.0217235
Bmi1	0.916926	0.0188539
Commd4	-1.00277	0.00547099
Commd7	-0.600248	0.00741812
Commd8	-1.10044	0.0372702
Commd9	-1.28015	0.0153603
Comt	-1.47607	0.00772812
Comtd1	-0.70857	0.0395938
Cops8	1.86827	0.000596984
Coq3	-1.31075	0.0123787
Coq4	1.17815	0.0299754
Coq7	-1.10093	0.00411624
Coq8a	-2.22504	0.00452047
Coro2b	2.73226	0.000103163
Cotl1	0.991881	0.00053975
Cox15	1.29986	0.00327783
Cox18	-0.775096	0.0243548
Cp	1.77741	0.0158753
Cpd	1.73914	0.00260049
Cpe	8.18356	0.000186308
Cpeb2	0.628705	0.00998565
Cped1	-0.981193	0.0266938
Cpm	-1.30687	0.0136243
Cpn1	-1.88833	0.00758
Cpne2	-1.59479	0.00406748
Cpped1	-2.09767	0.0034186
Cpq	-1.40928	0.00229792
Cps1	-1.97095	0.000697884
Cpt1a	-0.689423	0.00780726
Cpvl	-0.930258	0.00268661
Cpxm2	-2.22529	0.00143847
Crcp	0.863687	0.0371924
Creb3	1.73901	0.00723719
Crebbp	-0.626284	0.0447922
Crebl2	-0.793844	0.00190151
Crebrf	-0.749581	0.0118283
Crebzf	-0.737974	0.00542857
Creld2	-0.944296	0.00205708
Crem	-0.768321	0.00412744
Crim1	1.31241	0.00380455
Cript	-0.887868	0.0281558
Crispld1	-4.58868	0.000261418
Crk	0.678511	0.0117689
Crls1	1.15499	0.00967709
Crmp1	1.29549	0.0192717
Crnde	-0.973543	0.00614287
Crnkl1	-1.06443	0.0210625
Crocc	-0.904912	0.0232912
Crtap	-1.40784	0.00224377
Crtc3	-0.995739	0.0144519
Cryab	-1.17791	0.00353434
Cryba2	0.926533	0.0243034
Cryl1	-1.73003	0.00664566
Crym	-1.08082	0.0218235
Csgalnact1	4.56638	0.000315091
Csgalnact2	1.04705	0.020371
Csnk1a1	1.23623	0.00152696
Csnk1d	2.3925	0.000549414
Csnk1e	1.14963	0.0127025
Csnk2a1	1.03235	0.00263553
Csrnp1	1.97006	0.00162794
Csrnp2	0.855572	0.00121593
Csrnp3	-1.50622	0.0133834
Csrp1	1.05806	0.000959199
Csrp2	-2.32947	0.000552181
Cst3	1.16416	0.0108044
Cstb	-1.11341	0.0368986
Cstf1	-0.606939	0.00210426
Cstf3	0.670758	0.0382166
Ctbp2	-0.94737	0.00378473
Ctc1	1.00246	0.0184368
Ctdspl	0.681279	0.0146462
Ctgf	1.88379	0.00588066
Cthrc1	-1.00247	0.00834112
Ctla4	4.61176	0.000246901
Ctnna1	0.592099	0.0117473
Ctnnal1	-1.23702	0.00514299
Ctnnb1	-1.14576	0.00257826
Ctns	-0.885874	0.00447428
Ctps	-0.889208	0.0168544
Ctsb	1.62846	0.00098841
Ctsc	2.7683	0.000344796
Ctsf	-1.39085	0.00143371
Ctsg	3.19348	0.000803185
Ctsh	-3.14353	0.00081112
Ctsk	-3.41254	0.0011276
Ctsl	-1.55268	0.0113278
Ctss	0.999279	0.0275784
Cttnbp2	-1.67736	0.0101125
Cwc22	-0.616932	0.0348052
Cxadr	1.30935	0.0405359
Cxcl1	2.92924	0.000728026
Cxcl14	0.975368	0.017992
Cxcl2	6.47212	0.000539711
Cxcl5	5.54426	0.000254759
Cxcl15	5.94109	0.000359123
Cxcr4	6.73515	0.000315091
1810030O07Rik	0.777637	0.019774
Eola1	0.728948	0.0262786
Cxxc5	3.18096	0.000766575
Cyb561	-0.902323	0.0225076
Cyb561a3	-1.69811	0.00654636
Cyb5a	-1.35298	0.0069735
Cyb5b	-1.25697	0.0148497
Cyb5d1	1.41523	0.00662528
Cyb5r1	-0.65444	0.0204883
Cyb5r2	5.54725	0.000272813
Cybb	-1.03323	0.00721748
Cybrd1	-1.38235	0.00839602
Cycs	-1.2326	0.00290282
Cyfip1	-0.608445	0.00208711
Cygb	-0.644755	0.0140185
Cyld	0.591786	0.0183356
Cyp1a1	-0.608887	0.0486015
Cyp1b1	4.33192	0.000443299
Cyp24a1	0.813199	0.0182858
Cyp26b1	3.44741	0.00386187
Cyp27a1	-1.49243	0.00442948
Cyp2u1	-2.99966	0.00114042
Cyp51	-0.738942	0.0372294
Cysltr2	-1.22475	0.0145311
Cyth3	-0.782589	0.00343014
Daam1	-0.690718	0.00509835
Daam2	-1.98768	0.00384335
Dab2	-1.72389	0.000620972
Dact1	-3.63502	0.00164669
Daglb	1.4223	0.00357472
Dancr	-0.862687	0.00683589
Dapk1	-1.65942	0.00217756
Dapl1	7.67967	0.000564332
Dars2	-0.97725	0.0374944
Daw1	3.60074	0.000898104
Dazap2	-0.607572	0.0411552
Dbf4	-1.35497	0.00852719
Dbn1	0.915434	0.0149337
Dbr1	-0.808106	0.0271824
Dcaf12l1	-1.55115	0.0142109
Dcaf17	-1.19711	0.0195162
Dcaf4	-1.95767	0.00310085
Dcaf7	-0.783666	0.0183339
Dcbld1	3.48839	0.000358119
Dcbld2	2.11194	0.000313332
Dcc	2.27041	0.00323887
Dck	-1.0454	0.0129603
Dclk1	-2.564	0.000427709
Dclk2	-1.07078	0.0216907
Dclre1b	-1.37128	0.00331276
Dclre1c	-1.06225	0.0244492
Dcn	5.96195	0.000240906
Dcstamp	7.10909	9.43102e-05
Dct	-6.50441	0.000185635
Dctn1	0.679307	0.0189454
Dctn4	1.22721	0.0487052
Dctn5	0.587269	0.0474818
Dcun1d1	0.693314	0.0366997
Dcun1d3	1.98962	0.00262289
Dda1	1.54271	0.00313593
Ddah1	1.73919	0.00848006
Ddah2	0.795957	0.0147864
Ddb2	-0.898487	0.00263743
Ddhd2	-0.848197	0.00703276
Ddias	-1.73196	0.00310658
Ddit3	1.49939	0.00543478
Ddit4	1.11091	0.00133996
Ddit4l	2.34615	0.00494442
Ddr2	-0.703904	0.0202091
Ddrgk1	0.838417	0.0365448
Ddx11	-1.39349	0.00725889
Ddx19a	-0.622565	0.0371102
Ddx25	-1.17408	0.00779613
Ddx31	-0.593538	0.0446334
Ddx55	-1.09896	0.00548163
Ddx58	1.03864	0.00987816
Ddx59	-0.652622	0.02336
Decr2	0.757309	0.019958
Dedd	0.890152	0.0135899
Dedd2	1.45176	0.0012762
Degs1	-0.7521	0.0433991
Dek	-1.04471	0.00149348
Dennd1a	-0.711703	0.00988909
Dennd1b	1.42092	0.0289386
Dennd2a	-3.82286	0.000496152
Dennd2d	-1.14692	0.024364
Dennd3	0.867542	0.0498805
Dennd5b	-1.41513	0.00150318
Depdc1a	-3.44577	0.000577378
Depdc1b	-4.19098	0.00376288
Depdc7	-2.76666	0.00324606
Deptor	-0.724755	0.0236106
Dera	-1.24885	0.0152147
Desi1	1.16444	0.00975667
Det1	-0.767792	0.0188915
Dexi	-1.22504	0.0214364
Dffb	-1.22366	0.00572749
Gsdme	-0.88083	0.00384356
Dgat2	5.03785	0.000312087
Dgka	3.00806	0.00368296
Dgke	-1.07661	0.00887431
Dgkh	-1.13434	0.00519164
Dguok	0.956293	0.0149352
Dhfr	-1.65616	0.00292071
Dhrs1	1.98599	0.00118782
Dhrs11	1.35303	0.00134681
Dhrs13	2.11137	0.00189105
Dhrs2	1.599	0.0255631
Dhrs9	2.36304	0.00120866
Dhtkd1	-0.827251	0.0360609
Dhx30	-0.846199	0.0458453
Dhx32	0.607109	0.0470427
Dhx35	-0.828948	0.0398441
Diaph3	-4.21048	0.000385562
Dicer1	0.73796	0.0202587
Dido1	0.924193	0.00283387
Dio2	2.39247	0.00226909
Gm266	7.43197	0.000249482
Slc49a4	-0.822935	0.00143138
Dis3l	-1.53691	0.0139253
Dis3l2	-0.859574	0.0415573
Disp1	1.02434	0.0066458
Dkk1	1.48906	0.0126061
Dkk2	0.72078	0.0272057
Dkk3	-1.78599	0.00068543
Dlc1	-1.17457	0.00672067
Dleu2	-1.42377	0.0117957
Dlg1	-1.11822	0.00523497
Dlg3	1.12799	0.00732956
Dlg4	2.08615	0.00121551
Dlgap1	-1.23294	0.0285303
Dlgap5	-4.93309	0.000196009
Dll3	-0.983081	0.0259312
Dlx1	-1.03532	0.00441434
Dlx2	4.83193	0.000354707
Dmbt1	5.00613	0.00122542
Dmd	-1.34046	0.000332661
Dmxl1	-1.43726	0.00419935
Dmxl2	-1.57592	0.00666508
Dnaaf5	-0.956302	0.0114769
Dnaja4	-1.65026	0.00189294
Dnajb1	0.895963	0.00578276
Dnajb4	0.813827	0.0091782
Dnajb5	1.41349	0.00462097
Dnajb6	0.171523	0.00305859
Dnajc10	0.906512	0.0135969
Dnajc12	-1.85494	0.00701768
Dnajc13	-1.00175	0.00108472
Dnajc21	-1.22109	0.019403
Dnajc25	-0.857092	0.0258645
Dnajc27	-1.01155	0.0130158
Dnajc5	0.838696	0.00488673
Dnajc7	0.808031	0.0120001
Dnajc9	-0.925101	0.00766767
Dnase2b	-1.16329	0.0284448
Dner	4.67799	0.00118839
Dnm3	1.45844	0.0120128
Dnmbp	1.19008	0.0110549
Dnmt3a	-1.09169	0.025438
Dnph1	-0.922069	0.00754736
Dnttip1	2.34396	0.00508845
Dock1	2.77773	0.0089312
Dock10	-1.40489	0.0116178
Dock11	-1.55083	0.00420009
Dock3	2.13123	0.00263729
Dock7	-0.788395	0.0161281
Dock8	-1.50728	0.00725506
Dok3	0.694482	0.0305741
Dok5	-4.18318	0.000484821
Dok6	1.13048	0.00364227
Donson	-1.0638	0.00765329
Dot1l	1.1791	0.0121116
Dpcd	0.825014	0.0125948
Dph5	-0.837007	0.00113749
Dph6	-1.12982	0.00765134
Dpm3	-0.797871	0.00332849
Dpp4	-2.94908	0.000142345
Dpy19l2	-2.26606	0.00568036
Dpy19l4	-0.888708	0.0261247
Dpyd	0.947774	0.00975667
Dpysl3	-0.663857	0.0238443
Dr1	-0.693998	0.0223191
Dram1	-1.47742	0.0189849
Dram2	-1.06296	0.00657703
Drap1	2.14568	0.00775482
Draxin	2.60222	0.000766575
Drd2	1.07823	0.000900424
Dscc1	-1.25746	0.00408377
Vps26c	-0.636197	0.0088285
Dsel	2.99062	0.000782226
Dsn1	-1.25177	0.005537
Dsp	5.58435	0.000435858
Dst	-1.15589	0.0311037
Dstyk	-1.41851	0.000437455
Dtd2	-1.26441	0.0115076
Dtl	-3.90946	0.00146816
Dtnbp1	-1.2509	0.0106244
Dtwd1	0.809324	0.0305192
Dtwd2	-1.45611	0.00813849
Dtx4	-1.4909	0.0269514
Dtymk	-0.958643	0.00103786
Dubr	-0.780283	0.0241688
Dus4l	1.01322	0.0175795
Dusp1	4.94926	0.000142345
Dusp10	0.763135	0.00107077
Dusp16	-2.15941	0.000429769
Dusp18	1.84532	0.00343014
Dusp22	-1.07213	0.00968588
Dusp3	-0.894973	0.0105344
Dusp4	2.13135	0.000315999
Dusp5	7.143	0.00036563
Dusp6	2.40279	0.000503127
Dusp9	-1.24072	0.0153178
Dut	-1.83108	0.000503127
Dvl2	-0.733295	0.0110549
Dync1li2	-0.708972	0.00968266
Dync2h1	-0.903504	0.0302708
Dynlt1a	0.595188	0.00115684
Dynlt3	2.24335	0.00117206
Dyrk2	-1.28058	0.003724
Dnaaf4	-1.78394	0.00344168
Dzip1	-1.69906	0.00572439
Dzip1l	0.742726	0.0131826
Dzip3	-1.79037	0.00535967
E2f1	-0.704489	0.00390646
E2f2	-3.25957	0.00242242
E2f8	-1.31185	0.0231464
Eaf1	0.767813	0.0219991
Ebf1	1.70851	0.00130733
Ebpl	-1.32192	0.00530737
Ece2	0.647607	0.0361781
Echdc1	-0.927339	0.00768656
Echdc3	-1.17176	0.00918492
Ect2	-1.26594	0.00283279
Eda	2.13107	0.0132824
Eda2r	-0.635397	0.0467327
Edem1	1.30454	0.00547699
Edem2	1.21558	0.002375
Edf1	0.724961	0.0402784
Ednra	6.04501	0.000314963
Ednrb	-1.25707	0.00189099
Eef1a1	-1.13337	0.0136651
Efcab13	0.95307	0.0166943
Efhc1	-0.776235	0.0309205
Efhd1	-3.20241	0.0010621
Efhd2	0.950801	0.0321618
Efl1	1.14059	0.00922072
Efna5	2.33537	0.000207733
Efnb2	6.21641	0.000488034
Efnb3	-2.08694	0.00578719
Efs	-1.54391	0.0106893
Egr1	5.59345	0.000118983
Egr2	6.31787	0.000477456
Egr3	2.96325	0.00417604
Ehbp1	1.66699	0.00157904
Ehd1	1.31804	0.00990688
Ehd2	1.03539	0.00441401
Ehd3	1.28614	0.00344327
Ehd4	-1.05709	0.00296492
Ehf	5.83201	0.000208544
Ehhadh	-2.73486	0.00826827
Ei24	-0.944026	0.0172211
Eid2b	-0.917631	0.0273387
Eid3	1.3789	0.0418564
Eif1	0.613643	0.00783401
Eif2a	-0.638667	0.013127
Eif2b4	0.592955	0.0306384
Eif2b5	-0.665791	0.0233498
Eif2s2	0.768338	0.0409185
Eif3a	-1.39661	0.00162794
Eif3f	-1.08793	0.0204415
Eif3h	-0.802606	0.0125059
Eif4e3	-1.24126	0.00458825
Eif4g3	1.05225	0.0161776
Eif5	0.92829	0.00049446
Eif5a2	-1.23194	0.00826186
Eif5b	-0.627903	0.0463829
Eif6	0.953923	0.00507962
Elac1	0.912794	0.0109375
Elf1	-0.625194	0.021171
Elf2	-0.724022	0.0361286
Elfn1	-1.14558	0.0176242
Elk1	1.02839	0.0159399
Elk3	1.34183	0.00404481
Ell2	1.48136	0.00139403
Elmo2	0.751368	0.00292502
Elmod1	1.71312	0.00551113
Elmod2	-0.910589	0.0308428
Elp2	-1.21119	0.00216184
Elp3	-0.609944	0.0107468
Elp5	0.640029	0.0257408
Emc1	0.801978	0.0172211
Emc10	0.66466	0.0364683
Eme1	-1.2974	0.0125302
Eme2	0.919927	0.0032472
Emg1	0.936646	0.00730722
Emilin2	1.47192	0.0077303
Eml1	-1.00524	0.0201067
Eml4	-0.794596	0.0180416
Eml6	1.94796	0.00133623
Emp1	0.255392	0.0029539
Emp2	1.12532	0.000683977
Emsy	-0.832349	0.0203439
Enah	-1.03722	0.00573636
Enc1	1.62589	0.00128551
Eno1	0.884865	0.0142212
Enox1	1.32961	0.0199523
Enox2	0.734564	0.00612237
Enpp1	0.747974	0.00791155
Enpp2	-3.76905	0.00055185
Ensa	1.11939	0.00183389
Entpd3	2.36339	0.000649165
Entpd4	0.62966	0.0450865
Entpd6	1.69631	0.00243696
Entpd7	1.88048	0.000794098
Eomes	-0.999351	0.0267817
Epas1	-0.775861	0.0145736
Epb41	-1.28327	0.00142736
Epb41l3	-1.90017	0.000673741
Epb41l4a	-1.21877	0.0179348
Epb41l5	-2.0078	0.00290146
Epg5	-1.30097	0.0015911
Epha4	3.85467	0.000229272
Epha5	-1.86803	0.000234704
Ephb1	0.806073	0.00518575
Ephb2	0.711358	0.0204415
Ephb3	0.622082	0.0277328
Ephb4	-1.68597	0.0151759
Ephx1	-1.76266	0.00188013
Epm2a	-1.92177	0.000781475
Eps15	-0.806342	0.00634676
Eps8	-0.588077	0.0385214
Epsti1	1.11893	0.0190616
Erbb2	-0.839467	0.0257233
Erbb3	-0.716576	0.0135551
Erbin	-0.730298	0.0116178
Erc1	0.593223	0.0297161
Ercc1	3.0475	0.000552181
Ercc5	0.743071	0.00552869
Ercc6l	-2.02857	0.00727918
Ercc6l2	-1.193	0.00260804
Ercc8	-0.86294	0.0351618
Ereg	7.55992	0.000201955
Ergic1	2.03895	0.00314874
Eri2	-1.78665	0.0167553
Erich1	-1.0976	0.00378253
Erlec1	0.785752	0.00908617
Ermp1	-1.01154	0.00451009
Ern1	1.47727	0.00114903
Ero1a	0.829739	0.0395938
Errfi1	3.75368	0.000494278
Esco1	-0.878378	0.0190623
Esco2	-2.31574	0.0104989
Esr1	-0.912989	0.0385584
Esr2	4.06389	0.000142345
Esrp1	-4.73551	0.000505735
Esyt1	0.795426	0.0018842
Esyt2	2.70549	0.0296368
Etaa1	-0.757204	0.0290168
Etfa	-0.970957	0.000791179
Etfb	1.30983	0.00688229
Ethe1	1.99411	0.00568135
Ets1	-2.28123	0.00091985
Ets2	-1.04555	0.0115592
Etv1	1.92071	0.00143299
Etv4	1.39926	0.00694635
Etv5	-0.980584	0.000162069
Etv6	0.896143	0.00517595
Eva1a	-2.5667	0.00696777
Evc	-0.991521	0.011019
Evi2a	-2.39891	0.00300404
Evi2b	-1.1167	0.0108923
Evl	-1.85198	0.00619336
Exd2	-0.971763	0.0224898
Exo1	-3.2866	0.00075855
Exoc2	-0.917231	0.00689144
Exoc3	0.659083	0.026024
Exoc4	-0.824386	0.00555475
Exosc9	-0.96973	0.00258582
Ext1	0.731387	0.0337699
Extl1	1.2527	0.0215455
Eya3	0.638643	0.0179003
Ezh2	-2.18322	0.0107053
Ezr	2.07179	0.00081112
F11r	0.948112	0.0318576
F12	1.08729	0.032088
F2r	-2.48032	0.00130926
F3	3.62803	0.00423547
F5	1.61904	0.00217671
Faap20	0.932937	0.0174399
Fabp7	-2.12134	0.0045814
Fads2	-2.01313	0.0020403
Fads3	0.922421	0.0189193
Fah	1.82467	0.000646858
Fahd1	-0.697666	0.00812776
Faim	-1.21358	0.00074039
Fam102a	1.57206	0.00283034
Fam102b	-0.887604	0.00242337
Otulinl	1.87112	0.00551601
Fam110b	0.869061	0.0072629
Fam110c	1.22502	0.00920257
Fam111a	-1.26296	0.000690442
Fam114a1	0.952164	0.00753758
Fam117b	-1.13027	0.0380215
Fam118a	-1.14608	0.025178
Fam120aos	1.73727	0.00231476
Fam124a	-2.65623	0.00405509
Fam126a	-2.08069	0.000773849
Fam126b	-0.635902	0.0304199
Rtl8a	-0.646303	0.0412585
Fam129a	0.588572	0.0125371
Niban2	1.76124	0.0151677
Fam131b	3.25746	0.000521874
Retreg2	-1.23753	0.00685446
Fam135b	2.61084	0.002071
Fam13a	-1.69025	0.0014533
Fam13b	-1.23838	0.0301784
Fam13c	-0.607987	0.0255687
Fam149a	-3.02302	0.000312087
Fam149b	-0.795898	0.0329894
Fam155a	1.7961	0.00965952
Tmem28	5.55243	0.000791179
Tmem29	0.827758	0.0133407
Fam160a1	1.18824	0.0175416
Fam160b1	-0.862377	0.0073423
Fam161a	-2.40016	0.00261744
Fam162a	1.06632	0.00192991
Fam167b	-0.953551	0.0163435
Fam171b	-1.03273	0.0229563
Fam174b	-3.2614	0.000904054
Fam186a	-1.4761	0.0451427
Fam187a	0.723264	0.0110658
Fam189a2	-1.11678	0.0428315
Fam198b	-0.84572	0.0347438
Tafa2	-0.761407	0.00506745
Fam20c	1.62369	0.00240527
Fam210b	-0.945531	0.0009821
Prxl2b	-0.911693	0.0061893
Fam214b	1.28063	0.00387876
Fam217b	-1.94239	0.00629483
Fam219b	0.937432	0.0436571
Washc2	-0.817728	0.00231648
Fam222a	-1.06005	0.0316514
Fam222b	0.985864	0.00755657
Fam229b	-1.14621	0.00444383
Fam234a	0.963989	0.0292479
Shld2	-1.16603	0.000791179
Fam3c	1.46561	0.0160229
Dennd10	-1.23535	0.00175275
Tent5a	1.49799	0.00215686
Fam46c	3.0291	0.0019362
Fam53b	-1.41697	0.0245918
Tlcd3a	-1.06132	0.00209855
Mindy1	1.19848	0.00937185
Mindy2	-1.19016	0.00260804
Pimreg	-4.05604	0.000142345
Ripor2	-1.12685	0.0401188
Dipk1a	-1.61859	0.0162204
Dipk1b	-2.2003	0.00866623
Dipk1c	-3.27746	0.00671779
Fam76a	-0.973823	0.00321025
Fam81a	-0.622302	0.00585846
Fam83b	2.64928	0.00956594
Fam83d	-3.06889	0.00368725
Fam83g	1.80491	0.00463953
Lratd1	1.37006	0.00460646
Lratd2	2.33408	0.0128059
Fam89b	0.906318	0.00390646
Cibar1	-0.937714	0.0152306
Ciao2b	0.97259	0.0238345
Fanca	-0.930034	0.00289172
Fancb	-3.51913	0.000345624
Fancc	-0.585043	0.0166337
Fancd2	-3.06987	0.00188013
Fancf	-0.668391	0.0411147
Fancg	-0.856237	0.0229179
Fanci	-2.52413	0.00245792
Fancl	-1.46449	0.0020429
Fancm	-1.00153	0.00443924
Fank1	1.62044	0.0320016
Fap	-1.59354	0.0016284
Far1	-0.908717	0.0108794
Farp1	-0.263487	0.000751864
Farp2	-0.832929	0.00176524
Fars2	-0.863852	0.0209353
Farsa	0.788572	0.0120729
Fastkd3	-1.2159	0.00573295
Fat1	0.972537	0.00182765
Faxc	-2.60909	0.00164669
Fbl	-0.78481	0.0121815
Fblim1	1.09259	0.00316885
Fbln1	-2.9084	0.00081112
Fbln5	1.43973	0.0129025
Fbn1	1.43085	0.0043832
Fbxl16	1.11775	0.0479347
Fbxl17	-1.46853	0.0495075
Fbxl18	0.637263	0.04984
Fbxl21	6.84338	9.43102e-05
Fbxl4	-1.49461	0.00295791
Fbxo11	-0.611542	0.027182
Fbxo17	-2.29077	0.00296949
Fbxo25	-1.61174	0.00513354
Fbxo28	0.815907	0.00829698
Fbxo32	-1.74405	0.000868526
Fbxo34	-0.903005	0.00718755
Fbxo43	-0.71809	0.0209179
Fbxo46	0.691395	0.0110708
Fbxo5	-1.83793	0.00379837
Fbxo7	-0.690077	0.0018298
Fbxo8	-0.694668	0.0420936
Fbxw7	0.71785	0.0395938
Fcer1g	2.41936	0.00603756
Fcgr3	-0.980151	0.046218
Fcgrt	-2.00291	0.0163305
Fcho2	-1.08983	0.00590466
Fchsd2	-1.5927	0.00196613
Fcmr	-2.65186	0.00156307
Fcrla	-4.63965	0.000128087
Fcrlb	-0.755465	0.042603
Fdxr	-0.878908	0.00186575
Fech	-1.04226	0.000559234
Fem1a	0.594103	0.0282129
Fem1b	-1.16429	0.00197442
Fem1c	0.702783	0.0477458
Fen1	-1.42742	0.000188301
Fer	-0.917269	0.00155769
Fermt1	4.54214	0.000252393
Fez1	-1.14384	0.003064
Fgd4	-2.37665	0.00115684
Fgf1	1.06276	0.000926331
Fgf13	5.94908	0.000597432
Fgf14	1.29627	0.00386319
Fgf7	0.793789	0.0277977
Fgfr1	1.39657	0.000905356
Fgfrl1	2.56601	0.000253292
Fggy	1.0784	0.0163288
Fhdc1	1.90497	0.00667576
Fhit	-2.41509	0.00358204
Fhl1	-1.69701	0.000447305
Fhl2	2.57114	0.00072814
Fhod3	2.31941	0.0109908
Fibp	0.79921	0.025212
Fign	-1.69399	0.00154958
Fignl1	-1.10758	0.00257585
Fip1l1	-0.96033	0.0269045
Fitm2	-0.902861	0.0136243
Fjx1	1.68923	0.00156041
Fkbp14	-0.931628	0.0212229
Fkbp1a	1.06646	0.00365141
Fkbp5	2.13018	0.000385562
Fkbp7	-2.12734	0.00637074
Fkrp	1.02366	0.0256307
Flcn	-0.742684	0.00491735
Fli1	1.26425	0.00998869
Flnb	3.22295	0.0011137
Flot1	-0.902914	0.0405515
Flot2	0.787162	0.00516752
Flrt3	5.99561	0.000180507
Flt1	1.27799	0.0243829
Flvcr1	-1.13383	0.00902465
Flywch1	-0.668537	0.032389
Fmc1	-1.33182	0.0347289
Fmn1	1.52138	0.00360079
Fmnl2	3.61788	0.000211002
Fmnl3	1.89895	0.00350432
Fmo4	-1.62644	0.0249601
Fmr1	-0.734616	0.0182971
Fn1	3.25254	0.000358119
Fnbp1	-0.996387	0.012404
Fnbpl1	-1.63854	0.00118839
Fndc3a	0.767384	0.0185182
Fndc3b	1.36656	0.00397268
Fndc4	0.947244	0.0269514
Fnip2	-2.2299	0.000629078
Naalad2	-1.56468	0.0130391
Fosb	1.09175	0.00524399
Fosl1	2.90749	0.000390687
Foxc1	1.27456	0.0495323
Foxc2	1.78548	0.0180761
Foxd2	0.650593	0.0285037
Foxd3	-1.44628	0.0285526
Foxf2	-1.51373	0.00421334
Foxg1	2.03936	0.000594018
Foxh1	0.996106	0.0472766
Foxl1	3.41846	0.0176162
Foxm1	-3.58929	0.000744951
Foxn3	-1.32469	0.000391471
Foxo1	3.13114	0.00115676
Foxo4	0.607466	0.0210013
Foxp1	0.785965	0.0107908
Foxp4	0.624957	0.0143111
Foxq1	3.26897	0.000584319
Foxred2	-1.39269	0.00279375
Frat1	-1.0224	0.0363306
Frat2	-1.15869	0.0161412
Frem2	3.30268	0.00946881
Frmd3	1.14887	0.00357472
Frmd4a	1.37527	0.000629078
Frmd4b	-1.35099	0.0193658
Fry	1.1999	0.0442474
Fsbp	-1.59699	0.0119245
Fscn1	1.08761	0.0246037
Fst	3.71139	0.0012175
Fstl1	-1.58629	0.000410323
Fstl5	-0.94295	0.0204415
Fth1	-0.702478	0.00507759
Ftsj1	1.08965	0.00605156
Fubp1	-0.703502	0.0452723
Fubp3	0.670505	0.0309205
Furin	1.97283	0.00315837
Fut11	0.850057	0.0146462
Fut8	1.44045	0.00511865
Fxn	-1.36835	0.0118143
Fxr1	-0.758749	0.0107649
Fxr2	1.08915	0.00448081
Fxyd3	-1.92339	0.00365898
Fxyd5	1.57516	0.00316758
Fxyd6	-2.51539	0.00088488
Fyb	0.962612	0.00743184
Fyco1	-1.92048	0.0019362
Fzd7	-0.638427	0.0481413
G0s2	1.44802	0.0262786
G2e3	-1.26263	0.00555842
G3bp1	0.836623	0.00778954
G6pc3	1.30688	0.0054767
G6pdx	1.26341	0.00275555
Gab1	-1.40577	0.00257506
Gab3	0.628762	0.0150583
Gabpa	-0.725793	0.0329486
Gabpb1	0.955426	0.00289299
Gabrb3	-1.93186	0.00308247
Gabrg3	1.35883	0.0267621
Gadd45a	2.45908	0.00112576
Gadd45b	0.634046	0.00371094
Gal	3.22329	0.00115684
Gal3st4	-0.858216	0.0255371
Galm	-2.85809	0.00217756
Galnt1	0.667084	0.0123206
Galnt11	-0.835558	0.00502663
Galnt14	1.06042	0.0109379
Galnt2	0.63093	0.0422663
Galnt3	-2.80304	0.000315091
Galnt9	1.31264	0.00399579
Galt	-0.758643	0.0181319
Ganc	-1.46789	0.00100049
Gap43	4.91837	0.000162069
Gapdh	1.59903	0.000510981
Gapdhs	-1.12422	0.00397767
Gars	0.801612	0.0208756
Gart	-0.995505	0.0239351
Gas2	-1.19591	0.00956845
Gas2l3	-2.68408	0.000804163
Gas6	-0.664848	0.00730722
Gas7	1.4381	0.000510981
Gatad1	0.663584	0.0353694
Gatad2a	0.786895	0.0198257
Gatb	-1.40678	0.0228757
Nipsnap2	-1.40647	0.00387991
Gbe1	1.94438	0.00094253
Gbp2	1.54287	0.0166755
Gbp2b	-0.764862	0.0363129
Gca	-1.61989	0.00309395
Gcat	0.733575	0.0393824
Gclm	-1.07681	0.013363
Gcnt1	1.28429	0.0047135
Gcnt2	-1.17823	0.000756176
Gcnt4	2.72442	0.00540923
Gcom1	-0.980068	0.0419764
Gcsh	-0.889405	0.00190151
Gda	1.18119	0.00911593
Gdf15	-1.48475	0.00449427
Gdnf	3.04008	0.00154182
Gdpd5	-1.53058	0.0045663
Gem	5.15297	0.000675057
Gemin6	-0.839488	0.0257668
Gen1	-2.16485	0.00188404
Gfm1	-0.608286	0.00329397
Gfod1	1.08085	0.0043014
Gfpt2	5.69427	0.000169408
Gfra1	1.56894	0.00200016
Gga2	-1.32284	0.000667855
Ggcx	1.11607	0.0199307
Ggh	-2.02809	0.000675057
Ghr	2.4266	0.00298332
Gid8	0.612832	0.0243417
Gins1	-3.68424	0.000750499
Gins2	-4.39097	0.00742492
Gins4	-1.30847	0.0134385
Gipc3	-1.54658	0.0108908
Gipr	1.05908	0.0108923
Gja1	-1.06856	0.0383673
Gja3	-3.41496	0.00193101
Gjb1	1.64486	0.00190151
Gjb2	5.28021	0.000899202
Gjb3	1.17875	0.00290282
Gjc1	-1.86335	0.000432285
Gykl1	-0.908637	0.00312785
Gla	-0.898943	0.0129944
Glce	1.47613	0.0135082
Gldc	4.97245	0.000559234
Glg1	0.945293	0.00475215
Gli3	-0.853722	0.0128568
Glipr1	3.80447	0.000887912
Glipr2	1.37731	0.00780386
Glis3	2.22293	0.00758006
Glmn	-0.640412	0.025608
Glmp	-1.80615	0.00300404
Glo1	-0.587033	0.00472173
Glrx	1.40727	0.00305859
Glrx2	1.62738	0.00186575
Glrx3	0.991336	0.00682706
Gls	0.945117	0.000191172
Nop53	-0.883184	0.0371156
Glud1	1.49872	0.0359906
Glul	1.75161	0.000118983
Keg1	-1.51067	0.00518991
Gm2a	-1.03185	0.00257741
Gmnn	-1.94644	0.000667855
Gmpr	-2.29558	0.000552181
Gmps	-1.25354	0.00881767
Gna13	-0.751952	0.0157913
Gnai1	-1.05774	0.0122091
Gnai2	1.02172	0.0207922
Gnai3	0.751338	0.00620705
Gnal	-2.46029	0.000417109
Gnaq	-0.85753	0.0171617
Gnas	-0.689653	0.0192616
Gnb1	0.597978	0.0294948
Gng2	1.35746	0.00216572
Gnl3	-1.0046	0.00925768
Gnpda1	-1.06593	0.00412744
Gnptab	-1.17554	0.00569973
Golga4	-0.803849	0.0103411
Golga7b	-2.28494	0.00690028
Golga2	0.867256	0.00194852
Golim4	1.02924	0.0055051
Golt1b	0.676568	0.0178893
Gopc	0.658258	0.0179426
Gosr2	1.17238	0.00930115
Gpam	1.75598	0.00256726
Gpank1	1.06281	0.019171
Gpat3	6.94183	0.000157343
Gpat4	-1.54037	0.00036563
Gpatch11	0.65256	0.0110179
Gpc1	2.09131	0.00774507
Gpc2	-1.83029	0.0430663
Gpc6	1.70798	0.00190151
Gpd1l	-1.18828	0.00396684
Gphn	-1.14654	0.00409689
Gpi1	0.761691	0.0205957
Gpm6b	-0.617113	0.0130664
Gpn1	0.661799	0.0101399
Gpn3	-0.696777	0.00596142
Gpnmb	-1.90727	0.000811873
Gpr107	-0.814994	0.00283034
Gpr137b	-0.601544	0.0024028
Gpr143	-2.32713	0.00234928
Gpr153	-0.71591	0.0142536
Gpr155	2.15329	0.000127679
Gpr158	5.67406	0.000369854
Gpr161	-1.36296	0.000681519
Gpr180	-1.01942	0.00735435
Gpr19	-1.88949	0.00963067
Gpr3	0.813525	0.0433058
Gpr39	3.96218	0.00118839
Gpr4	0.759499	0.0465688
Gpr68	2.73313	0.00473801
Gpr75	1.53721	0.0125648
Asb3	1.05564	0.0125963
Gpr84	1.68433	0.0199808
Gpr85	-1.25422	0.0417274
Gpr88	4.33139	0.0012249
Gpr89	-0.777419	0.00441593
Gprc5a	1.74847	0.00255605
Gprc5b	-2.87378	0.00114042
Gprin3	-1.7193	0.00866623
Gpsm2	-1.8358	0.000526977
Gpt2	1.19549	0.00439501
Gpx1	0.872606	0.00396118
Gpx8	-0.812354	0.0139491
Gramd1c	0.924152	0.0155363
Gramd4	-1.20517	0.0435321
Grb14	3.71726	0.00700135
Grb2	0.952405	0.0138462
Greb1	-2.73115	0.000912471
Gria3	5.0771	0.000629078
Grik2	2.89321	0.00206979
Grin2a	1.30395	0.0332201
Grip1	-2.277	0.0028899
Grk3	-3.83772	0.00103786
Grk5	-0.783026	0.0210631
Grpel1	0.761811	0.0134509
Grtp1	0.990832	0.0225076
Gsap	1.05094	0.0285619
Gse1	0.962954	0.0494033
Haspin	-1.72818	0.00524408
Gsk3a	0.626983	0.0195115
Gsk3b	0.885869	0.00246583
Gskip	0.765811	0.0267817
Gspt1	-0.739701	0.0118386
Gss	0.993261	0.000345517
Gsta4	1.82265	0.00178131
Gstcd	-0.978309	0.012329
Gstm2	-2.07682	0.00125054
Gstm7	-2.02617	0.00330713
Gstm5	-1.19825	0.0108923
Gstm4	-2.22411	0.00472173
Gstp1	-1.74	0.00181495
Gstt1	-1.30288	0.00955233
Gtdc1	0.867474	0.00940302
Gtf2a1l	-1.69236	0.0147939
Gtf2h2	-0.886057	0.00508715
Gtf2i	-1.05024	0.00408377
Gtf2ird2	-1.00797	0.00371998
Gtf3c3	-0.826493	0.0207236
Gtpbp4	-0.73477	0.0295435
Gtse1	-2.01448	0.00172793
Gucy1b1	1.33929	0.0266938
Gulp1	0.902669	0.0244543
Gusb	-0.812963	0.0253137
Gxylt1	-1.52145	0.00661623
Gxylt2	2.20471	0.00264828
Gypc	-1.29964	0.0151124
Gys1	0.886586	0.0336124
Gzmb	5.85085	0.000115332
H2aj	-1.412	0.00269089
H2afv	-0.929772	0.0133412
H2afz	-0.810569	0.000285464
Habp4	-0.905194	0.000621859
Hacd1	-3.39598	0.00185779
Hacd2	-1.05694	0.00441629
Hacd3	-0.734918	0.00539472
Hacd4	-3.36778	0.00140958
Hadh	-1.99211	0.0019362
Hadha	-0.643475	0.00314152
Hagh	1.08427	0.0192734
Haglr	-3.06918	0.00030807
Hars	0.687231	0.0205753
Has2	-1.70187	0.010853
Haus1	-0.806426	0.0407618
Haus5	-1.05497	0.0195434
Haus6	-1.17252	0.007849
Haus7	-0.80052	0.0388312
Havcr2	0.741172	0.0389781
Hbegf	1.56389	0.00728855
Hcfc2	-0.979702	0.0393715
Hdac11	-1.08424	0.0276714
Hdac4	-0.656454	0.00511127
Hdac5	1.01163	0.0485883
Hdac8	0.936745	0.00350874
Hdac9	-1.35409	0.0180761
Hddc2	-0.619676	0.00594951
Hdgfl3	-0.949088	0.00212252
Hdhd2	-0.690493	0.0327883
Heatr1	-0.617315	0.0411692
Hebp1	-0.645038	0.00613298
Hectd1	0.908888	0.00611967
Hectd2	1.74803	0.00229885
Hecw2	3.40573	0.00103005
Hells	-2.1153	0.000360577
Helq	1.36895	0.0228757
Helz	-0.702079	0.0136105
Heph	-2.98047	0.00463555
Herc1	-1.01397	0.00114817
Herc2	-1.39996	0.00420978
Herc6	-0.687362	0.0206377
Herpud1	1.05625	0.00410108
Herpud2	-0.636734	0.0328052
Hes6	-4.11045	0.00347459
Hexa	-1.64079	0.00482128
Hexb	-0.911083	0.00491845
Hey1	2.73116	0.000840474
Hgsnat	0.605457	0.0382163
Hhat	-1.14788	0.00364227
Hhex	-0.761278	0.0157103
Hhip	3.95965	0.000296964
Hibadh	-0.537084	0.00190186
Hibch	-1.40377	0.00210426
Hif1a	1.7373	0.000564332
Higd2a	-0.715699	0.0050514
Hint1	-0.981096	0.0089238
Hint2	0.911466	0.0170775
Hip1	-0.814447	0.00762387
Hip1r	-0.985451	0.00521463
Hipk2	1.29922	0.00651909
Hipk3	0.975028	0.00305097
Hist1h1a	-3.37038	0.00268076
Hist1h1b	-1.44164	0.00313593
Hist1h1ac	-2.23662	0.0106547
H1f3	-2.71925	0.000407907
H1f4	-2.32847	0.00143592
H2ac11	-1.49008	0.00131007
Hist1h2ac	1.23776	0.0088285
H2ac4	-1.07056	0.0109263
H2ac13	-1.19002	0.0052066
H2ac14	-1.4518	0.00366901
Hist1h2bc	1.25832	0.0187731
H2bc14	-2.60216	0.00623581
Hist1h2be	-0.906239	0.00446644
H2bc7	-0.305873	0.00439774
H2bc23	-2.03685	0.00273876
H2bc11	0.629866	0.042906
Hist1h2bk	1.46618	0.00266575
H3c4	-0.760345	0.0232212
H3c13	-2.01565	0.00209855
H3c14	-1.69617	0.0327977
H3c10	2.3914	0.00390646
H3c11	-0.925944	0.0348599
H3c15	-1.50818	0.0106705
Hist1h3i	-3.71341	0.0078802
H4c5	-0.916635	0.0165231
Hist1h4h	0.682573	0.0008561
H4c6	-1.13407	0.0227738
H4c18	-2.08254	0.00665106
H2ac18	0.963323	0.039759
Hist2h2be	2.38119	0.00867833
H2aw	-1.20092	0.00928654
H4c9	-1.90394	0.00400089
Hivep1	-1.30452	0.0111911
Hivep3	1.76074	0.00606486
Hjurp	-3.45704	0.00386187
Hk2	-1.20853	0.0191656
H2-DMa	3.14048	0.00180967
H2-DMb1	6.27612	0.000415195
H2-Oa	2.59725	0.000322488
H2-Ob	0.856621	0.0143502
H2-Aa	5.86273	0.000144927
H2-Ab1	5.72564	0.000115332
H2-Ea	10.1554	7.29681e-05
Hltf	-1.08721	0.00270895
H13	0.937092	0.0488086
Hmbox1	-1.56778	0.00154129
Hmcn1	1.57351	0.0264364
Hmg20a	-1.21787	0.0123346
Hmg20b	-1.33319	0.000807661
Hmga1	2.84315	0.0022368
Hmga2	5.24563	0.000142345
Hmgb1	-1.131	0.00251227
Hmgb2	-2.72205	0.000755815
Hmgb3	-1.54265	0.00390559
Hmgcr	-0.971677	0.000915092
Hmgcs1	-1.49017	0.00164597
Hmgn3	-0.65369	0.00428041
[truncated: 3,066 more rows]
