# Supplementary material for: Dynamics of nevus development implicate cell cooperation in the growth arrest of transformed melanocytes
Source: eLife. 2020 Oct 13;9:e61026. doi: 10.7554/eLife.61026 (PMC7553774; doi:10.7554/eLife.61026)
Supplement: Figure 4—figure supplement 1—source data 1. [file elife-61026-fig4-figsupp1-data1.xlsx]

## Sheet: SourceData_S6A
Source Data related to Figure 4-supplemnt 1A
Mouse Age	P21
Mouse ID	Mouse identification
Area	Area of nest found in mouse skin (µm sq)
Radius	Radius calculated from area column using SQRT(Area/Pi)
Mouse ID	Area	Radius (µm)
1	836.07	16.3135
1	984.16	17.6994
1	1541.02	22.1477
1	1590.38	22.4996
1	1847.99	24.2535
1	1189.32	19.4569
1	1238.68	19.8566
1	1277.24	20.1633
1	2812.09	29.9185
1	1750.81	23.6072
1	825.27	16.2078
1	797.51	15.9328
1	1235.59	19.8318
1	1576.5	22.4012
1	1180.06	19.381
1	1204.74	19.5827
1	971.82	17.5881
1	2116.4	25.9552
1	2127.2	26.0213
1	1994.54	25.1969
1	994.95	17.7961
1	3851.78	35.0151
1	1670.6	23.0601
1	641.71	14.292
1	1109.1	18.7893
1	3566.41	33.6931
1	1224.8	19.745
1	1392.94	21.0567
1	2003.79	25.2552
1	558.41	13.3322
1	2753.48	29.6051
1	2355.5	27.3821
1	1340.49	20.6565
1	1841.82	24.213
1	729.63	15.2397
1	1081.34	18.5527
1	1531.77	22.0812
1	2478.9	28.0902
1	751.23	15.4636
1	1354.37	20.7632
1	1511.71	21.9361
1	1035.06	18.1513
1	1226.34	19.7574
1	3421.41	33.001
1	1773.95	23.7627
1	1059.74	18.3664
1	772.82	15.6843
1	3123.69	31.5325
1	1446.93	21.4609
1	1055.11	18.3263
1	2161.13	26.228
1	3785.45	34.7123
1	851.5	16.4633
1	842.24	16.3736
1	1326.6	20.5492
1	976.44	17.6298
1	399.52	11.277
1	1652.09	22.932
1	5477.64	41.7563
1	3426.03	33.0233
1	1554.9	22.2472
1	3500.08	33.3783
1	2600.76	28.7723
1	1659.8	22.9854
1	2313.85	27.1389
1	2349.32	27.3461
1	1787.83	23.8555
1	1638.2	22.8354
2	655.59	14.4458
2	1331.23	20.585
2	1628.95	22.7708
2	1508.63	21.9137
2	1396.02	21.08
2	1704.53	23.2931
2	1247.93	19.9306
2	2002.25	25.2455
2	1067.45	18.4331
2	2367.84	27.4537
2	1502.46	21.8689
2	1888.1	24.5153
2	1016.55	17.9883
2	2606.93	28.8065
2	2733.42	29.497
2	1260.27	20.0289
2	4584.5	38.2007
2	2506	28.2433
2	1624	22.7362
2	1289	20.2559
2	2745	29.5594
2	1844	24.2273
2	3368	32.7424
2	2323	27.1925
2	1858	24.3191
2	3748	34.5402
2	863	16.5741
2	985	17.7069
2	4215	36.6289
2	1056	18.334
2	3817	34.8567
2	2481.99	28.1077
2	1979.11	25.0992
2	1173.89	19.3303
2	1400.65	21.1149
2	886.97	16.8027
2	853.04	16.4782
3	2019	25.3509
3	1116	18.8476
3	1334	20.6064
3	2087	25.7743
3	1223.3	19.7329
3	948.68	17.3774
3	1405.3	21.15
3	1738.5	23.5241
3	1045.9	18.2461
3	1136.9	19.0233
3	323.94	10.1545
3	3074.3	31.2823
3	601.6	13.8382
3	1232.5	19.807
3	1038.2	18.1788
3	805.22	16.0097
3	1460.8	21.5636
3	649.42	14.3776
3	1249.5	19.9431
3	1030.4	18.1104
3	549.15	13.2212
3	893.14	16.8611
3	1203.2	19.5701
4	2770.4	29.6959
4	2013.1	25.3138
4	2301.5	27.0664
4	891.6	16.8465
4	1985.3	25.1384
4	3385.9	32.8293
4	924	17.1499
4	629	14.1498
4	1385.2	20.9982
4	1036.6	18.1648
4	1571.9	22.3685
4	808.3	16.0403
4	832.98	16.2833
4	942.51	17.3208
4	1072.1	18.4732
4	1320.4	20.5011
4	1155.4	19.1775
4	1386.8	21.0103
4	1291.1	20.2724
4	3075.9	31.2904
4	792.88	15.8865
4	2614.6	28.8488
4	550.7	13.2398
4	2171.9	26.2933
5	3165.3	31.7419
5	1360.5	20.8101
5	580	13.5875
5	598.51	13.8026
5	1510.2	21.9251
5	780.54	15.7624
5	885.43	16.7881
5	1371.3	20.8925
5	1647.5	22.9001
5	1186.2	19.4314
5	2019.2	25.3521
5	1173.9	19.3304
5	593.89	13.7492
5	671.02	14.6148
5	1058.2	18.3531
5	1662.9	23.0069
5	794.42	15.9019
5	455.06	12.0354
5	886.97	16.8027
5	1337.4	20.6327
6	564.58	13.4056
6	2221.3	26.5906
6	518.3	12.8445
6	940.96	17.3066
6	968.73	17.5601
6	1224.8	19.745
7	1463.9	21.5864
7	2073.2	25.6889
7	1275.7	20.1511
7	1329.7	20.5732
7	1214	19.6578
7	1018.1	18.002
7	1485.5	21.7451
7	10485	57.7709
7	1493.2	21.8014
7	1343.6	20.6805
7	1210.9	19.6327
7	2474.3	28.0641
7	2079.4	25.7273
7	769.74	15.653
7	876.18	16.7002
8	377.93	10.9681
8	726.55	15.2075
8	849	16.4391
8	620.11	14.0495
8	754.31	15.4953
8	809.85	16.0556
9	2065.49	25.6411
9	1801.71	23.9479
9	2647.04	29.0272
9	674.1	14.6483
9	3035.77	31.0856
9	1119.9	18.8806
9	220.6	8.37969
10	1149.2	19.1259
10	925.54	17.1642
10	962.56	17.5041
10	1476.2	21.6769
10	689.53	14.815
10	785.17	15.8091
10	549.15	13.2212
10	265.32	9.18988
10	347.08	10.5109
10	462.77	12.1369
10	1500.9	21.8575
10	2751.9	29.5966
10	792.88	15.8865
10	740.43	15.3521
10	240.64	8.75203

## Sheet: SourceData_S6B
Source Data related to Figure 4-supplemnt 1B
Mouse age	P50
Mouse ID	Mouse identification
Area	Area of nest found in mouse skin (µm sq)
Radius	Radius calculated from area column using SQRT(Area/Pi)
Mouse ID	Area	Radius (µm)
1	5758	42.8115
1	3272	32.2724
1	2182	26.3544
1	373	10.8963
1	1837	24.1813
1	853	16.4778
1	411	11.4379
1	2262	26.8331
1	882	16.7556
1	1154	19.1658
1	2784	29.7687
1	1789	23.8633
1	1934	24.8115
1	2532	28.3894
1	2159	26.2151
1	2344	27.3152
1	1699	23.2553
1	1730	23.4665
1	4350	37.2109
1	3156	31.6952
1	742	15.3683
1	1963	24.9968
1	1925	24.7537
1	3239	32.1093
1	2345	27.321
1	4284	36.9275
1	2813	29.9233
1	2793	29.8168
1	3061	31.2145
2	620	14.0482
2	843	16.3809
2	1468	21.6166
2	1534	22.0972
2	400	11.2838
2	1854	24.2929
2	816	16.1165
2	262	9.13221
2	735	15.2957
2	549	13.2194
2	4118	36.205
2	5928	43.4389
2	1917	24.7022
2	320	10.0925
2	4965	39.7544
2	1408	21.1703
2	1133	18.9907
2	3211	31.9702
2	4399	37.4199
2	3745	34.5264
2	2975	30.7729
2	1349	20.722
2	768	15.6353
2	1158	19.199
2	2873	30.2408
2	1092	18.6439
3	4226	36.6767
3	1935	24.8179
3	681	14.7231
3	814	16.0967
3	5065	40.1527
3	1511	21.9309
3	3742	34.5125
3	2344	27.3152
3	3211	31.9702
3	4175	36.4547
3	6299	44.7776
3	4154	36.3629
4	1695	23.2279
4	2091	25.799
4	2744	29.5541
4	377	10.9546
4	666.39	14.5643
4	1176.98	19.3557
4	1815.6	24.04
4	1723.04	23.4192
4	615.48	13.9969
4	3800	34.779
4	539	13.0984
4	1308	20.4046
4	2566	28.5794
4	5747	42.7706
4	438	11.8076
4	618	14.0255
4	353	10.6002
4	430	11.6993
4	598	13.7967
4	1284	20.2166
5	4032	35.8249
5	7339	48.333
5	2295	27.0282
5	1258	20.0108
5	1483	21.7268
5	879	16.7271
5	1041	18.2033
5	2600	28.7681
5	3520	33.4731
5	2384	27.5472
6	1457	21.5355
6	2252	26.7738
6	1243	19.8912
6	2816	29.9393
6	1036	18.1595
6	2188	26.3906
6	3842	34.9707
6	1210	19.6254
6	1869	24.391
6	1652	22.9314
6	2465	28.0113
7	1642	22.8619
7	1412	21.2003
7	1013	17.9568
7	1513	21.9455
7	1126	18.9319
7	2168	26.2697
7	2519	28.3165
7	2426	27.7888
7	4553	38.0692
8	769	15.6455
8	4444	37.6108
8	5170	40.5668
8	3655	34.109
8	3216	31.9951
8	2269	26.8746
8	3776	34.669
8	1440	21.4095
8	2392	27.5934
8	411	11.4379
8	561	13.3631
8	1048	18.2644
8	8309	51.428
8	7874	50.0637
8	3492	33.3397
8	2225	26.6128
9	3381.3	32.807
9	6339.9	44.9227
9	2448.1	27.9151
9	1138.4	19.0359
9	1439.2	21.4035
9	1630.5	22.7817
9	1491.7	21.7904
9	1612	22.6521
9	1860.3	24.3342
9	907.03	16.9917
9	4009.1	35.723
9	2352.4	27.3641
9	1354.4	20.7634
9	939.42	17.2924
9	3162.3	31.7268
9	502.88	12.6519
9	590.8	13.7134
9	1369.8	20.8811
9	4677	38.5841
9	2485.1	28.1253
9	5513.1	41.8912
9	2264.5	26.848
9	7967.3	50.3594
9	1408.4	21.1733
9	4240.5	36.7395
9	996.5	17.81
9	1616.6	22.6844
9	678.73	14.6985
9	637.08	14.2404
9	564.58	13.4056
9	1160	19.2156
9	4737.2	38.8317
9	2043.9	25.5067
9	522.93	12.9017
9	2937	30.5757
9	2341.6	27.3012
9	465.85	12.1772
10	1121.4	18.8932
10	9398.8	54.6967
10	302.34	9.81009
10	632.45	14.1886
10	3032.7	31.0699
10	1087.5	18.6054
10	1443.8	21.4377
10	3369	32.7473
10	2532.9	28.3945
10	7874.8	50.0662
10	1269.5	20.1021
10	913.2	17.0494
10	1832.6	24.1523
10	294.63	9.6842
10	356.33	10.65
10	652.5	14.4117
10	2070.1	25.6697
10	2059.3	25.6026
10	1109.1	18.7893
10	1047.4	18.2592
10	4707.9	38.7114
10	853.04	16.4782
10	2161.1	26.2278
10	755.86	15.5112
10	2062.4	25.6219
10	775.91	15.7156
10	1187.8	19.4445
10	1254.1	19.9798
11	799.05	15.9482
11	612.4	13.9618
11	2352.4	27.3641
11	778.99	15.7468
11	546.07	13.1841
11	994.95	17.7961
11	3344.3	32.627
11	812.93	16.0861
11	1234.1	19.8198
11	2642.4	29.0018
11	1069	18.4465
12	11318	60.0219
12	1718.4	23.3877
12	888.52	16.8174
12	967.19	17.5461
12	3291.8	32.3699
12	2363.2	27.4268
12	3688.3	34.264
12	2716.5	29.4056
12	2364.7	27.4355
12	5701.3	42.6002
12	1843.4	24.2234
12	1269.5	20.1021
12	1848	24.2536
12	1446.9	21.4607
12	916.28	17.0781
12	10263	57.1561
12	1374.4	20.9161
12	1959.1	24.972
12	1124.5	18.9193
12	7188.4	47.8345
12	1210.9	19.6327
12	4991.7	39.8611
12	1133.8	18.9974
12	1402.2	21.1266
12	592.34	13.7313
12	621.65	14.0669
12	1826.4	24.1114
12	6321.4	44.8572
12	1021.2	18.0294
12	1636.7	22.8249
12	885.43	16.7881
12	3253.3	32.1801
12	3922.7	35.336
12	2353.9	27.3728
12	5266.3	40.9428
12	769.74	15.653
12	2657.8	29.0861
13	1494.7	21.8123
13	1272.6	20.1266
13	1260.3	20.0291
13	1106	18.763
13	2946.3	30.6241
13	664.85	14.5475
13	3157.6	31.7032
13	1817.1	24.05
13	701.87	14.947
13	1030.4	18.1104
13	1235.6	19.8319
13	422.66	11.599
13	897.77	16.9047
13	2261.4	26.8296
13	3493.9	33.3488
13	1189.3	19.4568
13	999.58	17.8375
13	1905.1	24.6254
13	5806.2	42.9904
13	741.97	15.368
13	2363.2	27.4268
13	1652.1	22.9321
13	711.12	15.0451
13	3066.6	31.2431
14	1439.2	21.4035
14	1008.8	17.9196
14	2389.4	27.5784
14	5695.1	42.5771
14	2448.1	27.9151
14	1231	19.7949
14	1712.2	23.3455
14	714.21	15.0778
14	1127.6	18.9453
14	853.04	16.4782
14	624.74	14.1018
14	1817.1	24.05
14	1312.7	20.4413
14	2804.4	29.8776
14	769.74	15.653
14	829.9	16.2532
14	1507.1	21.9026
14	4930	39.614
14	3322.7	32.5215
14	762.03	15.5744
14	1261.8	20.041
14	1241.8	19.8816
15	800.59	15.9636
15	215.96	8.29109
15	751.23	15.4636
15	1912.8	24.6752
15	1326.6	20.5492
15	419.58	11.5567
15	356.33	10.65
15	3606.5	33.8819
15	2221.3	26.5906
15	1437.7	21.3924
15	2657.8	29.0861
15	4896.1	39.4776
15	2943.2	30.608
15	1701.4	23.2717
15	1360.5	20.8101
15	1064.4	18.4068
15	1488.6	21.7678
15	1741.6	23.545
15	439.63	11.8296
15	848.41	16.4334
15	1493.2	21.8014
15	3648.2	34.0772
15	1241.8	19.8816
15	2307.7	27.1028
15	515.22	12.8062
15	652.5	14.4117
15	556.87	13.3138
15	740.43	15.3521
15	373.3	10.9007
15	1119.9	18.8806
15	408.78	11.407
16	2284.5	26.9663
16	1721.5	23.4088
16	1018.1	18.002
16	470.48	12.2376
16	1059.7	18.3661
16	1334.3	20.6088
16	760.48	15.5585
16	8363.8	51.5973
16	1915.9	24.6951
16	1405.3	21.15
16	1436.1	21.3805
16	840.7	16.3586
16	4299.1	36.9925
16	481.28	12.3772
16	1343.6	20.6805
16	1770.9	23.7423
16	1736.9	23.5132
16	1274.2	20.1393
16	1022.7	18.0426
16	666.39	14.5643
16	1372.9	20.9047
16	617.03	14.0145
16	993.41	17.7824
16	3356.6	32.687
16	1167.7	19.2793
16	2853.7	30.139
16	1357.5	20.7872
16	1263.4	20.0537
16	866.92	16.6117
16	1633.6	22.8033
16	2215.1	26.5535
16	697.24	14.8976
16	2102.5	25.8698
16	436.55	11.7881
16	851.5	16.4633
16	442.72	11.8711
16	780.54	15.7624
16	382.56	11.0351
16	1201.7	19.5579
17	1952.9	24.9325
17	4763.4	38.9389
17	519.84	12.8635
17	485.91	12.4366
17	738.89	15.3361
17	1656.7	22.964
17	1534.8	22.103
17	832.98	16.2833
17	370.22	10.8556
17	4237.4	36.7261
17	1130.7	18.9714
17	613.94	13.9794
17	1823.3	24.091
17	340.91	10.4171
17	1312.7	20.4413
17	472.02	12.2576
17	2060.9	25.6126
17	3808.6	34.8183
17	1454.6	21.5177
17	893.14	16.8611
17	1934.4	24.8141
17	2787.4	29.7869
17	667.93	14.5811
17	4700.2	38.6797
17	862.29	16.5673
17	3032.7	31.0699
18	956.39	17.4479
18	422.66	11.599
18	1133.8	18.9974
18	464.31	12.1571
18	900.86	16.9338
18	2085.6	25.7656
18	1086	18.5926
18	1388.3	21.0216
18	1709.2	23.325
18	1565.7	22.3244
18	725.01	15.1914
18	5466.9	41.7153
18	424.21	11.6203
18	803.68	15.9944
18	749.69	15.4478
18	2079.4	25.7273
18	2599.2	28.7637
18	2003.8	25.2553
18	664.85	14.5475
18	1283.4	20.2119
18	2162.7	26.2375
18	2139.5	26.0964
18	1658.3	22.9751
18	1257.2	20.0045
18	419.58	11.5567
18	1005.8	17.8929
18	1215.5	19.6699
18	3583.4	33.7732
18	971.82	17.5881
18	717.29	15.1103
18	697.24	14.8976
18	1346.7	20.7043
18	364.05	10.7648
18	910.11	17.0205
18	495.16	12.5545
18	2114.9	25.946
18	882.35	16.7589
18	3180.8	31.8195
18	2366.3	27.4448
18	669.47	14.5979

## Sheet: SourceData_S6C
Source Data related to Figure 4-supplemnt 1C
Patient	Patient identification
Area	Area of nest found in patient (µm sq)
Radius	Radius calculated from area column using SQRT(Area/Pi)
Patient	Area	Radius (µm)
IDN1	24570.8	88.4372
IDN1	5062.8	40.144
IDN1	15982.6	71.3263
IDN1	7190.1	47.8402
IDN1	14710	68.4276
IDN1	2410.64	27.7007
IDN1	36888.7	108.361
IDN1	22991.6	85.548
IDN1	4979.19	39.8111
IDN1	15160.5	69.4676
IDN1	17343.6	74.3009
IDN1	28449.2	95.1612
IDN1	5076.73	40.1992
IDN1	17436.5	74.4996
IDN1	4909.52	39.5316
IDN1	10706.2	58.3771
IDN1	9345.27	54.5407
IDN1	16335.6	72.1096
IDN1	17069.5	73.7116
IDN1	33131.1	102.694
IDN1	18244.6	76.2066
IDN1	12963.5	64.2373
IDN1	9721.5	55.6278
IDN1	16098.8	71.5849
IDN1	16372.8	72.1916
IDN1	12104.3	62.0718
IDN1	29169.1	96.3578
IDN1	28439.9	95.1457
IDN1	22787.2	85.1669
IDN1	27185.8	93.0243
IDN1	6999.67	47.2024
IDN1	6279.73	44.7091
IDN1	8086.54	50.7349
IDN1	16461.1	72.3859
IDN1	5007.06	39.9224
IDN1	7854.3	50.001
IDN1	8309.49	51.4295
IDN1	9614.67	55.3213
IDN1	7436.27	48.6522
IDN1	13725.3	66.0976
IDN1	9108.39	53.8451
IDN1	4092.04	36.0907
IDN1	10069.9	56.6157
IDN1	6075.36	43.9755
IDN1	5494.76	41.8215
IDN1	11254.3	59.8527
IDN1	5304.32	41.0904
IDN1	6943.93	47.0141
IDN1	15169.8	69.4889
IDN1	15694.7	70.6808
IDN1	22071.9	83.8195
IDN1	33925.4	103.917
IDN1	18611.6	76.9692
IDN1	9470.68	54.9055
IDN1	11212.5	59.7414
IDN1	5717.71	42.6615
IDN1	1704.63	23.2938
IDN1	3808.71	34.8188
IDN1	5016.35	39.9594
IDN1	7166.88	47.7628
IDN1	5592.3	42.191
IDN1	8783.26	52.8753
IDN1	3915.54	35.3038
IDN1	12471.2	63.0056
IDN1	5592.3	42.191
IDN1	3948.05	35.45
IDN1	13906.4	66.5324
IDN1	11964.9	61.7135
IDN1	23874.1	87.1743
IDN1	8458.12	51.8874
IDN1	3664.72	34.1543
IDN1	3413.91	32.9648
IDN1	12485.1	63.0408
IDN1	69216.3	148.433
IDN1	15601.8	70.4713
IDN1	48853.7	124.702
IDN1	18017.1	75.7298
IDN1	109956	187.083
IDN1	30581.2	98.6625
IDN1	15309.2	69.8073
IDN1	19433.7	78.6508
IDN1	31041	99.4015
IDN1	4059.53	35.947
IDN1	19503.4	78.7916
IDN1	6335.46	44.907
IDN1	20715.7	81.2035
IDN1	55625.7	133.065
IDN1	6632.73	45.9485
IDN1	2977.3	30.7848
IDN1	3720.46	34.4131
IDN1	5062.8	40.144
IDN1	3836.58	34.946
IDN1	4821.27	39.1747
IDN1	6827.81	46.6193
IDN1	6702.4	46.1892
IDN1	16331	72.0994
IDN1	56777.6	134.435
IDN1	91464.8	170.629
IDN1	21417	82.5666
IDN1	4923.45	39.5877
IDN1	9201.29	54.1189
IDN1	4017.72	35.7614
IDN1	17120.6	73.8218
IDN1	11816.3	61.329
IDN1	13595.2	65.7837
IDN1	17710.5	75.0828
IDN1	17023.1	73.6112
IDN1	12907.8	64.099
IDN1	70280	149.569
IDN1	71078.9	150.416
IDN1	2196.97	26.4446
IDN1	3869.09	35.0937
IDN1	7334.09	48.3168
IDN1	6693.11	46.1572
IDN1	1565.29	22.3214
IDN1	6642.02	45.9806
IDN1	5462.25	41.6976
IDN1	14626.4	68.2328
IDN1	6340.11	44.9235
IDN1	2173.75	26.3045
IDN1	8913.31	53.2653
IDN1	7468.79	48.7585
IDN1	5160.34	40.5288
IDN1	16925.5	73.4
IDN1	1806.82	23.9818
IDN1	7092.56	47.5145
IDN1	7594.2	49.1661
IDN1	11119.6	59.4935
IDN1	2893.69	30.3495
IDN1	10966.3	59.082
IDN1	9754.01	55.7207
IDN1	21045.4	81.8473
IDN1	17399.3	74.4202
IDN1	19549.8	78.8854
IDN1	17153.1	73.8919
IDN1	42341.7	116.094
IDN1	2396.7	27.6205
IDN1	21904.7	83.5014
IDN1	4486.85	37.7916
IDN1	9048.01	53.6663
IDN1	8564.95	52.2141
IDN1	8755.39	52.7913
IDN1	7301.58	48.2096
IDN1	8095.83	50.764
IDN1	9828.33	55.9326
IDN1	12945	64.1912
IDN1	3446.42	33.1214
IDN1	7357.31	48.3932
IDN1	20539.2	80.8568
IND2	5874.35	43.2419
IND2	9579.57	55.2202
IND2	15398.1	70.0097
IND2	27686.7	93.8773
IND2	7922.46	50.2175
IND2	104617	182.484
IND2	11488	60.4711
IND2	30642.5	98.7614
IND2	17367	74.3512
IND2	22110.3	83.8923
IND2	23274	86.0717
IND2	24488.9	88.2896
IND2	19475.7	78.7356
IND2	23069.2	85.6921
IND2	26923.3	92.5741
IND2	36698.4	108.081
IND2	7605.93	49.2041
IND2	20332.1	80.4483
IND2	80984.1	160.555
IND2	22333.7	84.3151
IND2	25396.6	89.9109
IND2	21090.9	81.9355
IND2	16324.4	72.0847
IND2	87337.9	166.735
IND2	120326	195.707
IND2	12349.2	62.6966
IND2	15742.5	70.7884
IND2	16277.8	71.9819
IND2	13401.2	65.3125
IND2	55876.2	133.364
IND2	32611.5	101.885
IND2	8029.52	50.5557
IND2	16924.8	73.3985
IND2	9723.87	55.6345
IND2	4026.4	35.8
IND2	17097.1	73.771
IND2	5460.07	41.6893
IND2	4524.46	37.9497
IND2	29869.8	97.5082
IND2	105650	183.383
IND2	6507.4	45.5123
IND2	4566.35	38.125
IND2	10096.2	56.6898
IND2	12442.3	62.9325
IND2	43257	117.342
IND2	27789.1	94.0508
IND2	20625.4	81.0263
IND2	12358.5	62.7202
IND2	4948.05	39.6864
IND2	49564.3	125.606
IND2	23776.7	86.9963
IND2	99598.6	178.054
IND2	23506.7	86.501
IND2	25159.2	89.4897
IND2	15533	70.3159
IND2	86895.7	166.312
IND2	26122.7	91.1873
IND2	22231.3	84.1216
IND2	7610.59	49.2192
IND2	13373.2	65.2444
IND2	45011.9	119.698
IND2	49992.5	126.147
IND2	5273.88	40.9723
IND2	13820.1	66.3255
IND2	15588.9	70.4422
IND2	43866.8	118.166
IND2	55392.1	132.785
IND2	45039.8	119.736
IND2	16845.7	73.2267
IND2	4533.77	37.9887
IND2	52394.4	129.142
IND2	18158.4	76.0262
IND2	134761	207.113
IND2	44574.3	119.115
IND2	11590.4	60.74
IND2	42219	115.925
IND2	40710.8	113.836
IND2	25261.6	89.6717
IND2	17399.6	74.4209
IND2	29976.9	97.6828
IND2	10747.9	58.4908
IND2	4398.78	37.4189
IND2	6218.81	44.4917
IND2	7643.17	49.3244
IND2	52515.4	129.291
IND2	12465.5	62.9913
IND2	19005.5	77.7795
IND2	13666.5	65.9559
IND2	16864.3	73.2672
IND2	21323.6	82.3864
IND2	3947.27	35.4465
IND2	16813.1	73.1559
IND2	7266.13	48.0924
IND2	26281	91.4631
IND2	72535.7	151.95
IND2	38336.9	110.467
IND2	12889.1	64.0526
IND2	13550.1	65.6744
IND2	35679	106.569
IND4	37384.5	109.087
IND4	11744.7	61.143
IND4	23164.8	85.8695
IND4	7321.63	48.2757
IND4	23324.8	86.1655
IND4	18680.5	77.1115
IND4	39887.8	112.68
IND4	32467.4	101.66
IND4	58813	136.824
IND4	26072.7	91.1
IND4	20920.3	81.6035
IND4	22289.6	84.2318
IND4	20487.4	80.7548
IND4	70134.2	149.414
IND4	7255.75	48.0581
IND4	41835.9	115.398
IND4	37497.5	109.251
IND4	7876.87	50.0728
IND4	39186.7	111.685
IND4	11434.2	60.3292
IND4	10126.1	56.7734
IND4	11984.7	61.7645
IND4	14262.1	67.3778
IND4	30533.5	98.5855
IND4	23117.7	85.7823
IND4	15400.8	70.016
IND4	28783	95.7179
IND4	26110.4	91.1657
IND4	17071.3	73.7153
IND4	9519.06	55.0455
IND4	21993.1	83.6698
IND4	26703.2	92.1949
IND4	16756	73.0315
IND4	12619.9	63.3802
IND4	12205.9	62.3317
IND4	6964.02	47.082
IND4	3171.45	31.7727
IND4	12436.4	62.9177
IND4	4470.15	37.7212
IND4	10756.6	58.5143
IND4	13226.9	64.8865
IND4	11904.7	61.558
IND4	67743.9	146.845
IND4	28910.1	95.929
IND4	20459.2	80.6991
IND4	15287.9	69.7588
IND4	6069.99	43.9561
IND4	17805.3	75.2835
IND4	14445.6	67.8099
IND4	10671.9	58.2835
IND4	9086.16	53.7793
IND4	21880.2	83.4547
IND4	7914.51	50.1923
IND4	25188.1	89.5412
IND4	16718.3	72.9494
IND4	23503.6	86.4952
IND4	19762.8	79.3138
IND4	47792.9	123.341
IND4	49519.8	125.549
IND4	7199.29	47.8707
IND4	7269.87	48.1048
IND4	4357.22	37.2417
IND4	3180.86	31.8198
IND4	7335.75	48.3223
IND4	18849.9	77.4604
IND4	7773.35	49.7427
IND4	7561.61	49.0605
IND4	12276.4	62.5117
IND4	19941.6	79.6718
IND4	57321.4	135.078
IND4	7651.01	49.3497
IND4	26689.1	92.1706
IND4	35229.5	105.896
IND4	19565.1	78.9162
IND4	25818.6	90.655
IND4	19127.5	78.0287
IND4	13758.6	66.1779
IND4	10046.1	56.5488
IND4	22647.2	84.9048
IND4	3251.44	32.1709
IND4	53255.9	130.199
IND4	19165.2	78.1055
IND4	13335.2	65.1514
IND4	18233.5	76.1833
IND4	27169.1	92.9956
IND4	35187.1	105.832
IND4	46673	121.887
IND4	15744.3	70.7925
IND4	3849.03	35.0026
IND4	5557.1	42.058
IND4	6568.76	45.7264
IND4	24171.7	87.716
IND4	6738.16	46.3122
IND4	20915.6	81.5943
IND4	6441.72	45.282
IND4	6935.78	46.9865
IND4	13415.1	65.3466
IND4	12060	61.9582
IND4	6676.99	46.1015
IND4	4997.15	39.8829
IND4	6253.5	44.6156
IND4	12215.3	62.3557
IND4	9086.16	53.7793
IND4	11260.1	59.8681
IND4	9222.62	54.1816
IND4	5990	43.6655
IND4	22694.2	84.9929
IND4	7133.41	47.6512
IND4	10046.1	56.5488
IND6	9479.97	54.9324
IND6	5378.64	41.3772
IND6	3985.21	35.6165
IND6	8671.78	52.5387
IND6	9442.81	54.8246
IND6	6623.44	45.9163
IND6	5318.26	41.1443
IND6	26335.8	91.5585
IND6	4932.74	39.625
IND6	15100.1	69.3291
IND6	15996.6	71.3573
IND6	9438.17	54.8112
IND6	13878.6	66.4657
IND6	5034.93	40.0333
IND6	3293.14	32.3765
IND6	8332.71	51.5013
IND6	57859.9	135.711
IND6	11180	59.6548
IND6	8490.64	51.9871
IND6	12736	63.6709
IND6	40999.4	114.239
IND6	7139.01	47.6699
IND6	16465.7	72.3961
IND6	8792.55	52.9033
IND6	16595.8	72.6815
IND6	13990	66.7321
IND6	5425.09	41.5555
IND6	13079.7	64.5243
IND6	9284.89	54.3643
IND6	4890.94	39.4567
IND6	22643.2	84.8974
IND6	16461.1	72.3859
IND6	214412	261.246
IND6	96281.4	175.064
IND6	58668.1	136.655
IND6	18049.6	75.7981
IND6	85765.6	165.227
IND6	14844.7	68.7401
IND6	3302.43	32.4222
IND6	7784.63	49.7788
IND6	19182.9	78.1416
IND6	14844.7	68.7401
IND6	97284.7	175.973
IND6	96142.1	174.937
IND6	35337.4	106.058
IND6	42197.7	115.896
IND6	20882.9	81.5305
IND6	8239.82	51.2134
IND6	8472.06	51.9301
IND6	19642.7	79.0726
IND6	24817	88.8791
IND6	6019.62	43.7733
IND6	7334.09	48.3168
IND6	4152.42	36.356
IND6	13664.9	65.9521
IND6	33005.7	102.499
IND6	8160.86	50.9675
IND6	26883.9	92.5063
IND6	18142.5	75.9929
IND6	8643.91	52.4542
IND6	27283.4	93.191
IND6	26126.8	91.1944
IND6	88696.5	168.027
IND6	26089.7	91.1296
IND6	4765.53	38.9476
IND6	2800.8	29.8583
IND6	4760.89	38.9286
IND6	8267.69	51.3
IND6	25411.5	89.9374
IND6	59104.7	137.163
IND6	37854.9	109.771
IND6	14310.5	67.4921
IND6	89964.5	169.224
IND6	31742.3	100.518
IND6	34519.9	104.824
IND6	23196	85.9273
IND6	21096.5	81.9465
IND6	45374.7	120.18
IND6	37775.9	109.656
IND6	15216.3	69.5952
IND6	13488.4	65.5248
IND6	115645	191.862
IND6	29447.8	96.817
IND6	7320.15	48.2709
IND6	9470.68	54.9055
IND6	13502.3	65.5586
IND6	91316.1	170.49
IND6	16702.6	72.915
IND6	11834.9	61.3772
IND6	53136.1	130.053
IND6	77651.2	157.217
IND6	17417.9	74.4599
IND6	34766.1	105.197
IND6	19568.4	78.9229
IND6	64655.2	143.459
IND6	50428.2	126.696
IND9	20404.1	80.5904
IND9	13658.7	65.9371
IND9	15114.1	69.3612
IND9	10948.4	59.0338
IND9	6931.97	46.9736
IND9	9763.54	55.7479
IND9	9525.63	55.0645
IND9	8158.83	50.9611
IND9	67052.6	146.094
IND9	8504.03	52.028
IND9	8406.07	51.7275
IND9	6829.35	46.6245
IND9	8126.18	50.859
IND9	36026.7	107.087
IND9	35588.2	106.433
IND9	28908.1	95.9257
IND9	17502.5	74.6407
IND9	33736.2	103.627
IND9	147722	216.844
IND9	37458.8	109.195
IND9	17507.2	74.6506
IND9	9516.3	55.0376
IND9	32397.4	101.55
IND9	28110.4	94.5929
IND9	44661.3	119.231
IND9	80939.9	160.512
IND9	31053.9	99.4222
IND9	19307.8	78.3956
IND9	99916.5	178.338
IND9	17246	74.0916
IND9	7729.66	49.6027
IND9	16457.6	72.3783
IND9	17586.5	74.8195
IND9	51565.3	128.116
IND9	10174	56.9078
IND9	7039.26	47.3357
IND9	28413.6	95.1017
IND9	8629.98	52.4119
IND9	119672	195.174
IND9	28614.2	95.4368
IND9	30620.1	98.7253
IND9	17176	73.9411
IND9	9824.18	55.9208
IND9	23902.7	87.2265
IND9	7393.79	48.5131
IND9	24854.3	88.946
IND9	52451.6	129.212
IND9	7706.34	49.5278
IND9	19956.2	79.7011
IND9	8704.62	52.6381
IND9	12735	63.6686
IND9	14241.8	67.3298
IND9	7085.91	47.4923
IND9	13024.3	64.3875
IND9	5191.98	40.6529
IND9	8476.04	51.9423
IND9	11410.2	60.266
IND9	6115.62	44.121
IND9	5817.07	43.0306
IND9	7403.12	48.5437
IND9	36791.7	108.218
IND9	130033	203.447
IND9	75244.1	154.761
IND9	26734.3	92.2485
IND9	26034.5	91.0333
IND9	137240	209.009
IND9	52754.8	129.585
IND9	41517.2	114.958
IND9	21374.4	82.4844
IND9	2924.86	30.5125
IND9	9632.92	55.3738
IND9	4119.07	36.2097
IND9	13341.5	65.1669
IND9	13514.1	65.5871
IND9	20082.2	79.9522
IND9	24331.9	88.0061
IND9	4147.06	36.3325
IND9	7599.05	49.1818
IND9	8182.15	51.0339
IND9	12324.5	62.634
IND9	39511.3	112.147
IND9	13966.6	66.6761
IND9	31735	100.507
IND9	20809.9	81.388
IND9	25600.7	90.2716
IND9	22256	84.1683
IND9	5140.67	40.4515
IND9	8695.29	52.6098
IND9	7552.4	49.0306
IND9	71050.4	150.386
IND9	5350.59	41.2692
IND9	29355.9	96.6658
IND9	3260.73	32.2168
IND9	22932.4	85.4378
IND9	181990	240.685
IND9	70910.4	150.238
IND9	23133	85.8106
IND9	18472.8	76.6817
IND9	8923.86	53.2969
IND9	10537.9	57.9165
IND9	72529.1	151.943
IND9	297240	307.594
IND9	31175.2	99.6162
IND9	10472.6	57.7367
IND9	26197.8	91.3183
IND9	9824.18	55.9208
IND9	20478.7	80.7377
IND9	25334.8	89.8016
IND9	11461.5	60.4014
IND9	11998	61.7987
IND9	9082.47	53.7684
IND9	19765	79.3183
IND9	33358.4	103.045
IND9	10794.5	58.6173
IND9	247027	280.413
IND9	61594.7	140.022
IND9	9427.67	54.7807
IND9	12431.8	62.9061
IND9	7748.32	49.6625
IND9	35401.6	106.154
IND9	36241.2	107.406
IND9	29990.3	97.7048
IND9	21220.4	82.1868
IND9	105799	183.512
IND9	51481.3	128.012
IND9	30456.8	98.4617
IND9	110655	187.677
IND9	5812.41	43.0133
IND9	9101.13	53.8236
IND9	24882.3	88.996
IND9	24042.7	87.4815
IND9	46154.1	121.208
IND9	53720.5	130.766
IND9	39268.7	111.802
