# Supplementary material for: Dynamics of nevus development implicate cell cooperation in the growth arrest of transformed melanocytes
Source: eLife. 2020 Oct 13;9:e61026. doi: 10.7554/eLife.61026 (PMC7553774; doi:10.7554/eLife.61026)
Supplement: Figure 4—source data 1. [file elife-61026-fig4-data1.xlsx]

## Sheet: Sheet1
Source Data related to Figure 4E
Area	Area of a nevus in µm sq
Radius	radius calculated from the area as SQRT(Area/Pi)
Mouse ID	The mouse identification number from which the nevi was obtained.
Area	Radius (µm)	Mouse ID
21909.4	83.5104	1
13201.8	64.825	1
23033	85.6249	1
19943.2	79.6751	1
32583.3	101.841	1
12359.2	62.722	1
16010.7	71.3889	1
21347.6	82.4328	1
11516.5	60.546	1
29774.4	97.3523	1
36796.6	108.225	1
7022.25	47.2785	1
8145.81	50.9205	1
13763.6	66.1898	1
8707.59	52.6471	1
16572.5	72.6305	1
14606.3	68.186	1
14325.4	67.5271	1
12640.1	63.4307	1
20505	80.7895	1
30336.1	98.2664	1
18538.7	76.8184	1
17134.3	73.8513	1
20224.1	80.2342	1
9831.15	55.9406	1
33706.8	103.582	1
51964.7	128.611	1
18538.7	76.8184	1
10112	56.7341	1
21347.6	82.4328	1
20505	80.7895	1
12359.2	62.722	1
14325.4	67.5271	1
7303.14	48.2148	1
20224.1	80.2342	1
9831.15	55.9406	1
20785.9	81.3409	1
37920.2	109.865	1
26965.5	92.6465	1
18538.7	76.8184	1
16010.7	71.3889	1
12640.1	63.4307	1
23313.9	86.1454	1
16572.5	72.6305	1
12920.9	64.1316	1
18819.6	77.3982	1
15449	70.1253	1
8426.7	51.791	1
10673.8	58.2888	1
25561	90.2015	1
30336.1	98.2664	1
15168.1	69.4849	1
45504.2	120.351	1
13763.6	66.1898	1
25841.9	90.6958	1
13482.7	65.511	1
15729.8	70.7599	1
14887.2	68.8385	1
14325.4	67.5271	1
17134.3	73.8513	1
14044.5	66.8618	1
15729.8	70.7599	1
10392.9	57.5167	1
17977	75.6455	1
21347.6	82.4328	1
15449	70.1253	1
24156.5	87.6885	1
26403.7	91.6763	1
22752.1	85.1012	1
16572.5	72.6305	1
5056.02	40.1171	1
29212.6	96.4295	1
21066.8	81.8887	1
16010.7	71.3889	1
24156.5	87.6885	1
22471.2	84.5743	1
15168.1	69.4849	1
12920.9	64.1316	1
26122.8	91.1874	1
28369.9	95.0285	1
12920.9	64.1316	1
7584.03	49.1332	1
24718.3	88.7022	1
18257.9	76.2342	1
12359.2	62.722	1
20785.9	81.3409	1
13201.8	64.825	1
10954.7	59.0508	1
20785.9	81.3409	1
12078.3	62.0051	1
15449	70.1253	1
13763.6	66.1898	1
31459.7	100.07	1
19381.4	78.5449	1
10392.9	57.5167	1
20224.1	80.2342	1
10954.7	59.0508	1
21909.4	83.5104	1
37639.3	109.458	1
25280.1	89.7046	1
12920.9	64.1316	1
13201.8	64.825	1
11235.6	59.803	1
17134.3	73.8513	1
17696.1	75.0522	1
9831.15	55.9406	1
12078.3	62.0051	1
5898.69	43.3314	1
18538.7	76.8184	1
11516.5	60.546	1
13201.8	64.825	1
14606.3	68.186	1
19662.3	79.112	1
18538.7	76.8184	1
16853.4	73.2435	1
9550.26	55.1357	1
12920.9	64.1316	1
19381.4	78.5449	1
19943.2	79.6751	1
9550.26	55.1357	1
16010.7	71.3889	1
21066.8	81.8887	1
16291.6	72.0124	1
13201.8	64.825	1
14325.4	67.5271	1
11235.6	59.803	1
11235.6	59.803	1
15449	70.1253	1
8988.48	53.4895	1
16291.6	72.0124	1
8426.7	51.791	1
8426.7	51.791	1
12920.9	64.1316	1
7864.92	50.0348	1
11235.6	59.803	1
16853.4	73.2435	1
15449	70.1253	1
18819.6	77.3982	1
8145.81	50.9205	1
15168.1	69.4849	1
17415.2	74.4542	1
12640.1	63.4307	1
8145.81	50.9205	1
15449	70.1253	1
15168.1	69.4849	1
5898.69	43.3314	1
9269.37	54.3188	1
7303.14	48.2148	1
8707.59	52.6471	1
10392.9	57.5167	1
10392.9	57.5167	1
8988.48	53.4895	1
5056.02	40.1171	1
13763.6	66.1898	1
19381.4	78.5449	1
12920.9	64.1316	1
8145.81	50.9205	1
11516.5	60.546	1
8145.81	50.9205	1
4775.13	38.9868	1
15168.1	69.4849	1
12359.2	62.722	1
11235.6	59.803	1
11797.4	61.2799	1
13763.6	66.1898	1
14325.4	67.5271	1
18538.7	76.8184	1
10112	56.7341	1
15729.8	70.7599	1
16853.4	73.2435	1
19943.2	79.6751	1
7864.92	50.0348	1
22190.3	84.044	1
10673.8	58.2888	1
9269.37	54.3188	1
15729.8	70.7599	1
8988.48	53.4895	1
10954.7	59.0508	1
8707.59	52.6471	1
10392.9	57.5167	1
5898.69	43.3314	1
15449	70.1253	1
7022.25	47.2785	1
8707.59	52.6471	1
7303.14	48.2148	1
11797.4	61.2799	1
8145.81	50.9205	1
14044.5	66.8618	1
9550.26	55.1357	1
9269.37	54.3188	1
14887.2	68.8385	1
7864.92	50.0348	1
9269.37	54.3188	1
14606.3	68.186	1
5617.8	42.2871	1
14044.5	66.8618	1
12359.2	62.722	1
33706.8	103.582	2
12920.9	64.1316	2
12359.2	62.722	2
32864.1	102.279	2
27246.3	93.1278	2
18819.6	77.3982	2
20785.9	81.3409	2
36796.6	108.225	2
13482.7	65.511	2
10954.7	59.0508	2
12078.3	62.0051	2
19381.4	78.5449	2
24156.5	87.6885	2
9550.26	55.1357	2
12920.9	64.1316	2
15449	70.1253	2
28650.8	95.4978	2
14044.5	66.8618	2
17696.1	75.0522	2
40729.1	113.862	2
15168.1	69.4849	2
12359.2	62.722	2
23594.8	86.6628	2
28650.8	95.4978	2
27808.1	94.0829	2
12359.2	62.722	2
20505	80.7895	2
32021.5	100.959	2
34549.5	104.869	2
19943.2	79.6751	2
50560.2	126.861	2
23875.7	87.1772	2
31178.8	99.6219	2
18538.7	76.8184	2
16010.7	71.3889	2
20505	80.7895	2
20505	80.7895	2
26684.6	92.1627	2
18257.9	76.2342	2
23875.7	87.1772	2
14606.3	68.186	2
32864.1	102.279	2
39324.6	111.881	2
24718.3	88.7022	2
16010.7	71.3889	2
25841.9	90.6958	2
11797.4	61.2799	2
37077.5	108.638	2
17134.3	73.8513	2
10673.8	58.2888	2
26403.7	91.6763	2
19943.2	79.6751	2
21066.8	81.8887	2
22752.1	85.1012	2
10954.7	59.0508	2
17977	75.6455	2
16010.7	71.3889	2
22471.2	84.5743	2
16010.7	71.3889	2
17415.2	74.4542	2
13201.8	64.825	2
30055.2	97.8104	2
17415.2	74.4542	2
12359.2	62.722	2
14606.3	68.186	2
22190.3	84.044	2
17696.1	75.0522	2
10954.7	59.0508	2
16010.7	71.3889	2
12920.9	64.1316	2
16010.7	71.3889	2
23594.8	86.6628	2
19100.5	77.9736	2
8707.59	52.6471	2
30897.9	99.1721	2
25841.9	90.6958	2
8988.48	53.4895	2
52526.4	129.305	2
15729.8	70.7599	2
25280.1	89.7046	2
42414.4	116.193	2
44661.5	119.232	2
27808.1	94.0829	2
19943.2	79.6751	2
22471.2	84.5743	2
29774.4	97.3523	2
26122.8	91.1874	2
24718.3	88.7022	2
28369.9	95.0285	2
23875.7	87.1772	2
37077.5	108.638	2
42414.4	116.193	2
18538.7	76.8184	2
13763.6	66.1898	2
21628.5	82.9734	2
35673	106.56	2
18538.7	76.8184	2
13763.6	66.1898	2
24999.2	89.2048	2
16010.7	71.3889	2
15449	70.1253	2
12640.1	63.4307	2
20785.9	81.3409	2
31178.8	99.6219	2
15449	70.1253	2
29212.6	96.4295	2
21066.8	81.8887	2
16572.5	72.6305	2
13201.8	64.825	2
11797.4	61.2799	2
14325.4	67.5271	2
43257.1	117.342	2
20785.9	81.3409	2
28369.9	95.0285	2
14044.5	66.8618	2
20224.1	80.2342	2
14325.4	67.5271	2
16291.6	72.0124	2
13482.7	65.511	2
31178.8	99.6219	2
33987.7	104.013	2
13201.8	64.825	2
16010.7	71.3889	2
16853.4	73.2435	2
18538.7	76.8184	2
14044.5	66.8618	2
32021.5	100.959	2
32302.4	101.401	2
10112	56.7341	2
12078.3	62.0051	2
24156.5	87.6885	2
29212.6	96.4295	2
21628.5	82.9734	2
14044.5	66.8618	2
17696.1	75.0522	2
18538.7	76.8184	2
35111.3	105.718	2
18819.6	77.3982	2
32583.3	101.841	2
19381.4	78.5449	2
26684.6	92.1627	2
48313.1	124.01	2
24437.4	88.1968	2
16291.6	72.0124	2
31178.8	99.6219	2
37077.5	108.638	2
16010.7	71.3889	2
33987.7	104.013	2
26403.7	91.6763	2
40729.1	113.862	2
20224.1	80.2342	2
41571.7	115.033	2
14887.2	68.8385	2
25841.9	90.6958	2
18819.6	77.3982	2
39324.6	111.881	2
23313.9	86.1454	2
20505	80.7895	2
50841.1	127.213	2
32583.3	101.841	2
46908.6	122.194	2
28931.7	95.9648	2
28931.7	95.9648	2
24999.2	89.2048	2
32021.5	100.959	2
37077.5	108.638	2
29493.5	96.892	2
10392.9	57.5167	2
10392.9	57.5167	2
15729.8	70.7599	2
13763.6	66.1898	2
14044.5	66.8618	2
38201.1	110.271	2
35673	106.56	2
67975.4	147.096	2
28931.7	95.9648	2
20505	80.7895	2
29493.5	96.892	2
39043.7	111.481	2
32583.3	101.841	2
17134.3	73.8513	2
40729.1	113.862	2
63762.1	142.464	2
23594.8	86.6628	2
22752.1	85.1012	2
12359.2	62.722	2
19381.4	78.5449	2
35953.9	106.979	2
15729.8	70.7599	2
34830.4	105.294	2
23033	85.6249	2
30336.1	98.2664	2
28931.7	95.9648	2
21628.5	82.9734	2
19381.4	78.5449	2
14044.5	66.8618	2
13482.7	65.511	2
18538.7	76.8184	2
66851.8	145.875	2
30617	98.7203	2
33706.8	103.582	2
35673	106.56	2
17977	75.6455	2
19381.4	78.5449	2
19100.5	77.9736	2
10673.8	58.2888	2
7864.92	50.0348	2
22752.1	85.1012	2
25841.9	90.6958	2
39324.6	111.881	2
24156.5	87.6885	2
17415.2	74.4542	2
17415.2	74.4542	2
12920.9	64.1316	2
13763.6	66.1898	2
17415.2	74.4542	2
20224.1	80.2342	2
91570.2	170.727	2
23033	85.6249	2
17134.3	73.8513	2
64042.9	142.778	2
28931.7	95.9648	2
14887.2	68.8385	2
32021.5	100.959	2
32583.3	101.841	2
39886.4	112.678	2
16291.6	72.0124	2
33987.7	104.013	2
25280.1	89.7046	2
24156.5	87.6885	2
21066.8	81.8887	2
22190.3	84.044	2
65447.4	144.335	2
23875.7	87.1772	2
15168.1	69.4849	2
20785.9	81.3409	2
11797.4	61.2799	2
11797.4	61.2799	2
12359.2	62.722	2
17977	75.6455	2
20785.9	81.3409	2
13482.7	65.511	2
12920.9	64.1316	2
28089	94.5569	2
23313.9	86.1454	2
32864.1	102.279	2
12078.3	62.0051	2
12640.1	63.4307	2
21909.4	83.5104	2
37077.5	108.638	2
20505	80.7895	2
14887.2	68.8385	2
16853.4	73.2435	2
32021.5	100.959	2
19943.2	79.6751	2
18819.6	77.3982	2
27808.1	94.0829	2
33425.9	103.149	2
30055.2	97.8104	2
14044.5	66.8618	2
17134.3	73.8513	2
33425.9	103.149	2
24999.2	89.2048	2
23033	85.6249	3
32583.3	101.841	3
13201.8	64.825	3
9831.15	55.9406	3
26684.6	92.1627	3
28089	94.5569	3
23875.7	87.1772	3
27808.1	94.0829	3
12359.2	62.722	3
20224.1	80.2342	3
20224.1	80.2342	3
17696.1	75.0522	3
14887.2	68.8385	3
15449	70.1253	3
18819.6	77.3982	3
18257.9	76.2342	3
30055.2	97.8104	3
14887.2	68.8385	3
21066.8	81.8887	3
43538	117.722	3
18538.7	76.8184	3
15729.8	70.7599	3
19943.2	79.6751	3
12078.3	62.0051	3
16291.6	72.0124	3
21628.5	82.9734	3
12920.9	64.1316	3
15729.8	70.7599	3
43257.1	117.342	3
34268.6	104.442	3
26403.7	91.6763	3
19381.4	78.5449	3
28089	94.5569	3
33706.8	103.582	3
23594.8	86.6628	3
39886.4	112.678	3
17134.3	73.8513	3
34830.4	105.294	3
30897.9	99.1721	3
35111.3	105.718	3
24437.4	88.1968	3
17415.2	74.4542	3
41290.8	114.644	3
25280.1	89.7046	3
22752.1	85.1012	3
14887.2	68.8385	3
18819.6	77.3982	3
14325.4	67.5271	3
28369.9	95.0285	3
25841.9	90.6958	3
21347.6	82.4328	3
27808.1	94.0829	3
26965.5	92.6465	3
17134.3	73.8513	3
16572.5	72.6305	3
24156.5	87.6885	3
32021.5	100.959	3
20505	80.7895	3
12920.9	64.1316	3
36796.6	108.225	3
25561	90.2015	3
33425.9	103.149	3
25841.9	90.6958	3
23313.9	86.1454	3
18819.6	77.3982	3
42133.5	115.808	3
16010.7	71.3889	3
31178.8	99.6219	3
22471.2	84.5743	3
15168.1	69.4849	3
20505	80.7895	3
11516.5	60.546	3
14887.2	68.8385	3
15449	70.1253	3
15168.1	69.4849	3
15449	70.1253	3
29212.6	96.4295	3
21066.8	81.8887	3
18819.6	77.3982	3
22752.1	85.1012	3
12920.9	64.1316	3
17696.1	75.0522	3
12640.1	63.4307	3
14887.2	68.8385	3
23594.8	86.6628	3
19100.5	77.9736	3
29774.4	97.3523	3
23313.9	86.1454	3
8707.59	52.6471	3
10112	56.7341	3
12359.2	62.722	3
10112	56.7341	3
38481.9	110.676	3
14325.4	67.5271	3
23875.7	87.1772	3
22752.1	85.1012	3
19381.4	78.5449	3
12640.1	63.4307	3
21909.4	83.5104	3
30336.1	98.2664	3
26122.8	91.1874	3
24718.3	88.7022	3
22190.3	84.044	3
8707.59	52.6471	3
28089	94.5569	3
16572.5	72.6305	3
19100.5	77.9736	3
23313.9	86.1454	3
25561	90.2015	3
23875.7	87.1772	3
49717.5	125.8	3
41852.6	115.421	3
24718.3	88.7022	3
30336.1	98.2664	3
30897.9	99.1721	3
19943.2	79.6751	3
15168.1	69.4849	3
24437.4	88.1968	3
16572.5	72.6305	3
23313.9	86.1454	3
35111.3	105.718	3
41571.7	115.033	3
32021.5	100.959	3
12640.1	63.4307	3
39043.7	111.481	3
21066.8	81.8887	3
20785.9	81.3409	3
37077.5	108.638	3
43538	117.722	3
18257.9	76.2342	3
20505	80.7895	3
12920.9	64.1316	3
25561	90.2015	3
21909.4	83.5104	3
19943.2	79.6751	3
34268.6	104.442	3
14325.4	67.5271	3
28650.8	95.4978	3
29493.5	96.892	3
30617	98.7203	3
21066.8	81.8887	3
37639.3	109.458	3
25280.1	89.7046	3
33145	102.715	3
44099.7	118.479	3
17134.3	73.8513	3
14044.5	66.8618	3
49717.5	125.8	3
48874.9	124.729	3
23313.9	86.1454	3
25841.9	90.6958	3
16572.5	72.6305	3
20224.1	80.2342	3
16291.6	72.0124	3
28931.7	95.9648	3
27527.2	93.6066	3
22190.3	84.044	3
28369.9	95.0285	3
34549.5	104.869	3
20505	80.7895	3
34830.4	105.294	3
20785.9	81.3409	3
25841.9	90.6958	3
25561	90.2015	3
20505	80.7895	3
16291.6	72.0124	3
30336.1	98.2664	3
17134.3	73.8513	3
21909.4	83.5104	3
22190.3	84.044	3
10673.8	58.2888	3
12920.9	64.1316	3
19381.4	78.5449	3
33425.9	103.149	3
44661.5	119.232	3
11797.4	61.2799	3
21347.6	82.4328	3
27527.2	93.6066	3
30336.1	98.2664	3
23033	85.6249	3
28369.9	95.0285	3
19100.5	77.9736	3
19381.4	78.5449	3
30336.1	98.2664	3
21909.4	83.5104	3
34549.5	104.869	3
19381.4	78.5449	3
26403.7	91.6763	3
14606.3	68.186	3
14606.3	68.186	3
24718.3	88.7022	3
21628.5	82.9734	3
42976.2	116.96	3
27527.2	93.6066	3
33987.7	104.013	3
32021.5	100.959	3
12078.3	62.0051	3
15168.1	69.4849	3
26122.8	91.1874	3
7864.92	50.0348	3
10673.8	58.2888	3
13201.8	64.825	3
8145.81	50.9205	3
28369.9	95.0285	3
11235.6	59.803	3
18257.9	76.2342	3
31178.8	99.6219	3
14044.5	66.8618	3
16291.6	72.0124	3
18819.6	77.3982	3
14606.3	68.186	3
9550.26	55.1357	3
27527.2	93.6066	3
17134.3	73.8513	3
13482.7	65.511	3
16853.4	73.2435	3
19662.3	79.112	3
17977	75.6455	3
16572.5	72.6305	3
20785.9	81.3409	3
18538.7	76.8184	3
25280.1	89.7046	3
11797.4	61.2799	3
18538.7	76.8184	3
17134.3	73.8513	3
13482.7	65.511	3
21066.8	81.8887	3
14325.4	67.5271	3
37077.5	108.638	3
26684.6	92.1627	3
26122.8	91.1874	3
10112	56.7341	3
28650.8	95.4978	3
16572.5	72.6305	3
12078.3	62.0051	3
14887.2	68.8385	3
15168.1	69.4849	3
14325.4	67.5271	3
9550.26	55.1357	3
18257.9	76.2342	3
13763.6	66.1898	3
13763.6	66.1898	3
18819.6	77.3982	3
18538.7	76.8184	3
10954.7	59.0508	3
14606.3	68.186	3
24999.2	89.2048	3
25841.9	90.6958	3
25841.9	90.6958	3
24999.2	89.2048	3
11516.5	60.546	3
27246.3	93.1278	3
11797.4	61.2799	3
12359.2	62.722	3
17977	75.6455	3
15729.8	70.7599	3
18257.9	76.2342	3
19943.2	79.6751	3
28369.9	95.0285	3
13482.7	65.511	3
15168.1	69.4849	3
15449	70.1253	3
19100.5	77.9736	3
11235.6	59.803	3
9831.15	55.9406	3
14325.4	67.5271	3
14044.5	66.8618	3
10954.7	59.0508	3
17134.3	73.8513	3
14606.3	68.186	3
10954.7	59.0508	3
7022.25	47.2785	3
12078.3	62.0051	3
13201.8	64.825	3
9550.26	55.1357	3
15729.8	70.7599	3
16291.6	72.0124	3
7303.14	48.2148	3
13482.7	65.511	3
16853.4	73.2435	3
16572.5	72.6305	3
13201.8	64.825	3
17696.1	75.0522	3
22190.3	84.044	3
23875.7	87.1772	3
22752.1	85.1012	3
14044.5	66.8618	3
22752.1	85.1012	3
19100.5	77.9736	3
16853.4	73.2435	3
18819.6	77.3982	3
18819.6	77.3982	3
10954.7	59.0508	3
14044.5	66.8618	3
13763.6	66.1898	3
12078.3	62.0051	3
14325.4	67.5271	3
9550.26	55.1357	3
11797.4	61.2799	3
9831.15	55.9406	3
17415.2	74.4542	3
14887.2	68.8385	3
15168.1	69.4849	3
14606.3	68.186	3
16291.6	72.0124	3
15449	70.1253	3
6179.58	44.3511	3
14325.4	67.5271	3
