# Supplementary material for: Dynamics of nevus development implicate cell cooperation in the growth arrest of transformed melanocytes
Source: eLife. 2020 Oct 13;9:e61026. doi: 10.7554/eLife.61026 (PMC7553774; doi:10.7554/eLife.61026)
Supplement: Figure 5—source data 1. — Data are from nests visualized by MPM at postnatal day 21. Analysis was restricted to fields with at least 10 nests. [file elife-61026-fig5-data1.xlsx]

## Sheet: Sheet1
Source data related to Figure 5E-F
Field Number	Microscopic field of view
Nest area	Measured area of nests, in square microns
x-coordinate	Location of centroid of nest within field (in microns)
y-coordinate
Field Number	Nest area (µm^2)	x-coordinate	y-coordinate
1	836.07	295	90
	984.16	423	137
	1541.02	387	149
	1590.38	298	191
	1847.99	231	194
	1189.32	141	214
	1238.68	609	240
	1277.24	294	232
	2812.09	376	258
	1750.81	483	337
	825.27	264	332
	797.51	280	362
	1235.59	511	377
	1576.5	424	391
	1180.06	81	366
	1204.74	493	424
	971.82	227	434
	2116.4	447	450
	2127.2	240	474
	1994.54	522	483
	994.95	98	510
	3851.78	404	504
	1670.6	344	541
	641.71	448	555
	1109.1	295	602
	3566.41	479	591
	1224.8	531	618
2	1392.94	285	77
	2003.79	409	176
	558.41	572	238
	2753.48	296	370
	2355.5	326	391
	1340.49	413	398
	1841.82	469	396
	729.63	375	305
	1081.34	382	330
	1531.77	280	422
	2478.9	324	438
	751.23	250	561
	1354.37	611	582
3	1511.71	36	62
	1035.06	419	73
	1226.34	376	78
	3421.41	116	188
	1773.95	607	176
	1059.74	494	186
	772.82	83	211
	3123.69	531	218
	1446.93	94	243
	1055.11	409	305
	2161.13	366	320
	3785.45	396	355
	851.5	160	269
	842.24	74	335
	1326.6	204	372
	976.44	485	335
	399.52	565	361
	1652.09	268	386
	5477.64	351	394
	3426.03	178	422
	1554.9	473	445
	3500.08	459	486
	2600.76	383	529
	1659.8	429	611
	2313.85	168	586
	2349.32	137	613
	1787.83	329	613
	1638.2	380	618
4	655.59	177	64
	1331.23	340	108
	1628.95	394	125
	1508.63	299	250
	1396.02	330	254
	1704.53	362	286
	1247.93	161	346
	2002.25	109	399
	1067.45	522	397
	2367.84	291	404
	1502.46	247	421
	1888.1	499	438
	1016.55	448	455
	2606.93	536	464
	2733.42	481	484
	1260.27	612	485
	4584.5	285	488
5	2506	409	63
	1624	501	88
	1289	361	172
	2745	399	201
	1844	34	306
	3368	93	310
	2323	316	355
	1858	471	376
	3748	521	439
	863	409	459
	985	377	471
	4215	337	507
	1056	439	517
	3817	493	546
6	1136.9	567	114
	323.94	459	119
	3074.3	580	154
	601.6	614	193
	1232.5	190	263
	1038.2	490	264
	805.22	325	273
	1460.8	293	289
	649.42	248	322
	1249.5	545	424
	1030.4	264	468
	549.15	430	485
	893.14	40	510
	1203.2	237	598
