# Supplementary material for: Dynamics of nevus development implicate cell cooperation in the growth arrest of transformed melanocytes
Source: eLife. 2020 Oct 13;9:e61026. doi: 10.7554/eLife.61026 (PMC7553774; doi:10.7554/eLife.61026)
Supplement: Source data 2. [file elife-61026-data2.xlsx]

## Sheet: Sheet1
Data S2. Parameters values used in CompuCell3D model of nevus growth arrest
Refers to Figure 5C-D
Property	Value	Units	Comments
Simulation Domain
Monte Carlo Steps in simulation	30000
Lattice Width	300	px	Note 1
Lattice Area	900	px^2
Cell proliferation
Cell Target Area	36	px^2
growth	0.05, 0.1, 0.15		Note 2
mitosis	72-80	px^2	Note 3
Contact Energy
Medium-Medium	0	J
Medium-Dividing	10	J
Medium-Non dividing	5	J
Dividing-Dividing	15	J
Dividing-Non dividing	15	J
Non dividing-Non dividing	2	J
Diffusible Signal
Secretion	0.0025	MCS^-1
Diffusion Constant	6	px^2/MCS
Decay Constant	0.026667	MCS^-1
Transisiton (differentiation) probability	a/(1+a)		Note 4
Note 1	Abbreviations: px = pixel, MCS = Monte Carlo Step
Note 2	random.choice(): after every cell division choose between these three values
Note 3	random.choice(range()): after every cell division choose an integer between 72 and 80.
Note 4	a = the concentration of the diffusible molecule at the center of mass of the cell, divided by 0.3
